# 1 **Role of Gasdermins in the Biogenesis of Apoptotic Cell-Derived Exosomes**

2 Running title: Gasdermins-mediated increase of apoptotic exosomes

3

4 Jaehark Hur<sup>1,2,\*</sup>, Yeon Ji Kim<sup>1,2,\*</sup>, Da Ae Choi<sup>1,2,\*</sup>, Dae Wook Kang<sup>1,2,\*</sup>, Jaeyoung Kim<sup>3,4,\*</sup>, Hyo Soon Yoo<sup>1,2</sup>, Sk  
5 Abrar Shahriyar<sup>1,2</sup>, Tamanna Mustajab<sup>1,2</sup>, Dong Young Kim<sup>3,5</sup>, Yong-Joon Chwae<sup>1,2</sup>

6

7 <sup>1</sup>Department of Microbiology, Ajou University School of Medicine, Suwon,  
8 Gyeonggi-do 16499, South Korea; <sup>2</sup>Department of Biomedical Science, Graduate School of Ajou University,  
9 Suwon, Gyeonggi-do 16499, South Korea; <sup>3</sup>Department of Medicine, Graduate School of Ajou University,  
10 Suwon, Gyeonggi-do 16499, South Korea; <sup>4</sup>CK-Exogene Inc., Seoul 54853, South Korea; <sup>5</sup>Department of  
11 Otolaryngology, Ajou University School of Medicine, Suwon, Gyeonggi-do 16499, South Korea

12

13 \*These authors contributed equally to this work.

14

15 **Address correspondence to:** Yong-Joon Chwae, Department of Microbiology, Ajou University School of  
16 Medicine, 164 World Cup Road, Yeongtong-gu, Suwon, Gyeonggi-do 443-380, South Korea. Tel: +82 31 219  
17 5073; Fax: +82 31 219 5079; E-mail: [soiloie0603@hanmail.net](mailto:soiloie0603@hanmail.net)

18

1 **Abstract**

2 The gasdermins, GSDMA, GSDMB, GSDMC, GSDMD, DFNA5, and DFNB59, are a family of pore-forming  
3 proteins that has recently been suggested to play a central role in the pyroptosis and the release of inflammatory  
4 cytokines. Here, we describe the novel roles of gasdermins in the biogenesis of apoptotic cell-derived exosomes.  
5 In apoptotic cells, GADMA, GSDMC, GSDMD, and DFNA5 increased the release of ApoExos, and both their  
6 full-length and cleaved forms were localized in the exosomal membrane. GSDMB and DFNB59, on the other  
7 hand, negatively affected the release of ApoExos. The caspase-mediated cleavage of gasdermins, especially  
8 DFNA5, is suggested to enable cytosolic  $Ca^{2+}$  to flow through endosomal pores and thus increase the biogenesis  
9 of ApoExos. In addition, the DFNA5-mediated biogenesis of ApoExos depended on the ESCRT-III complex  
10 and endosomal recruitment of  $Ca^{2+}$ -dependent proteins: annexins A2 and A7, the PEF domain family proteins  
11 sorcin and grancalcin, and the Bro1 domain protein HD-PTP. Therefore, we propose that the biogenesis of  
12 ApoExos begins when gasdermin-mediated endosomal pores increase cytosolic  $Ca^{2+}$ , continues through the  
13 recruitment of annexin-sorcin/grancalcin-HD-PTP, and is completed when the ESCRT-III complex synthesizes  
14 intraluminal vesicles in the multivesicular bodies of dying cells. Finally, we found that Dfna5-bearing tumors  
15 released ApoExos to induce inflammatory responses in the *in vivo* 4T1 orthotopic model of breast cancer. The  
16 data presented in this study indicate that the switch from apoptosis to pyroptosis could drive the transfer of mass  
17 signals to nearby or distant living cells and tissues by way of extracellular vesicles, and that gasdermins play  
18 critical roles in that process.

19

## 1 **Introduction**

2 Gasdermins, a family of pore-forming proteins, comprise six genes in humans: *GSDMA*, *GSDMB*, *GSDMC*,  
3 *GSDMD*, *DFNA5* (also known as *GSDME*), and *DFNB59* (also known as *PJVK*). All of them except *DFNB59*  
4 consist of an N-terminal domain, a C-terminal domain, and a linker domain. Recent studies have demonstrated  
5 that the pore-forming activity of the N-terminal domains is prohibited by a structural auto-inhibitory function  
6 conferred by the C-terminal domains. The N-terminal domains can be activated by caspase-mediated cleavages  
7 in the linker domain, which results in the formation of membrane pores that evoke pyroptosis and  
8 inflammation. *GSDMD* can be cleaved by proinflammatory caspases [caspases 1, 11 (in mice), or 1, 4, and 5 (in  
9 humans)], which allows it to act as the main executor of the inflammasome pathway; in that role, it facilitates  
10 the release of proinflammatory cytokines such as IL1 $\beta$  and IL18 and induces pyroptosis, thereby contributing to  
11 the innate immune response [1, 2, 3]. It has been recently noted that *GSDMD* can be activated by caspase 8 [4, 5]  
12 and the neutrophil elastase [6, 7, 8] suggesting that it could be implicated in other processes, such as the  
13 transition from apoptosis to pyroptosis and NETosis. Reportedly, *DFNA5* can be cleaved by caspase 3 to carry  
14 out the pyroptotic transition in apoptotic cells [9, 10].

15 Although EVs have mostly been inspected in live cells during normal or stressed conditions, recent advances  
16 in EV research have highlighted EVs from dying cells [11]. Among them, apoptotic cell-derived exosomes  
17 (apoptotic exosomes: ApoExos), which originate from endosomes, are proposed to be secreted in a caspase 3-  
18 and 9-dependent manner. ApoExos have unique markers, including a sphingosine-1-phosphate receptor 1/3  
19 (S1PR1/3), in addition to the known, exosome-specific tetraspanin CD63, which is involved in S1P/S1PR  
20 signaling and the subsequent endocytosis of the plasma membrane that occurs during ApoExo biogenesis [12,  
21 13]. ApoExos have recently been shown to carry out a variety of functions, such as the induction of  
22 inflammation or an autoimmune response, the proliferation of tumors, and increasing cellular survival [11, 12].

23 Even though the synthesis of ApoExos is apoptotic caspase-dependent, no substrate has been found for the  
24 effector caspases that contribute to the biogenesis of ApoExos. In this research, we found that gasdermins play a  
25 key role in the maturation of MVBs during the biogenesis of ApoExos. Furthermore, we investigated the  
26 molecular mechanisms of the gasdermin-mediated maturation of MVBs and the biological significance of the  
27 gasdermins, focusing on *DFNA5*.

28

## 1 **Results**

### 2 **The release of ApoExos can be regulated by gasdermin family genes**

3 Cell lines showing higher expression of DFNA5 and GSDMD released more ApoExos although not in  
4 MCF7 cell line (Fig. S1). Moreover, overexpression of DFNA5 substantially increased the release of ApoExos,  
5 but DFNA5 knockout nearly completely blocked the release of ApoExos (Supplementary Fig. 2a and c). In  
6 addition, DFNA5 overexpression promoted pyroptotic cell death at an early phase of cell death; in contrast,  
7 DFNA5 knockout postponed cell death (Fig. S2b). Transiently expressed DFNA5 also increased the release of  
8 ApoExos in a dose-dependent manner (Fig. S3), and GSDMD knockout along with DFNA5 knockout reduced  
9 both the release of exosomes and cell death (Fig. S4).

10 Therefore, to further investigate the roles of gasdermins in the biogenesis of ApoExos, we asked whether the  
11 overexpression of each gasdermin would affect exosome release. To answer that question, we used treatment  
12 with staurosporine or TNF $\alpha$  and cycloheximide to induce apoptotic cell death in HeLa cells overexpressing  
13 gasdermins and then prepared ApoExos. We found that the overexpression of GSDMA, GSDMC, GSDMD, or  
14 DFNA5 considerably increased the release of ApoExos, as confirmed by western blotting and nanoparticle  
15 tracking analyses (NTAs). In contrast, the overexpression of GSDMB or DFNB59 did not increase and indeed  
16 significantly decreased the release of exosomes (Fig. 1a, b, d, and e, and S5). The overexpression of GSDMC,  
17 GSDMD, or DFNA5 augmented cell death, whereas overexpression of DFNB59 reduced cell death but only in  
18 staurosporine-treated cells (Fig. 1c and f). On the other hand, the overexpression of gasdermins in caspase 3  
19 knockout cells eliminated the effects of GSDMA, GSDMC, and GSDMD on both the release of ApoExos and  
20 cell death, though DFNA5 still promoted the release of ApoExos and cell death. GSDMB and DFNB59  
21 inhibited the release of ApoExos, consistent with the results from wild-type cells, and DFNB59 also prohibited  
22 pyroptotic cell death (Fig. 1g–1i). In 293T cells, DFNA5 increased the release of exosomes, but GSDMB and  
23 DFNB59 slightly suppressed the release of exosomes, analogous to the results in HeLa cells. GSDMA, GSDMC,  
24 and GSDMD showed no effects on the release of exosomes, which is inconsistent with the results in HeLa cells  
25 (Supplementary Fig. 6a and b). Meanwhile, GSDMA, GSDMC, GSDMD, and DFNA5 enhanced pyroptotic cell  
26 death, but DFNB59 partially blocked cell death (Fig. S6c).

27 Collectively, our data demonstrate that DFNA5 promoted the release of ApoExos and enhanced pyroptotic  
28 cell death in all situations of apoptosis. On the other hand, GSDMB and DFNB59 played negative roles in the

1 release of exosomes, and DFNB59 partially inhibited pyroptotic cell death. GSDMA-, GSDMC-, or GSDMD-  
2 mediated changes in exosome release and pyroptotic cell death depended on caspase 3 in a cell type-specific  
3 manner.

4

#### 5 **Gasdermins are localized in the ApoExos in their full-length or cleaved form**

6 Next, we examined where the gasdermins were localized on the membranes in which they subsequently  
7 made pores. Except for GSDMD, DFNA5, and DFNB59, the gasdermins were barely detectable in parental  
8 HeLa cells but observed by western blotting only in overexpressed cells (Fig. 2a). In overexpressed cells,  
9 GSDMA, GSDMC, GSDMD, and DFNA5 were detected in their full lengths and several cleaved forms in  
10 ApoExos. In particular, the full-length and cleaved forms of DFNA5 were detected in exosomes prepared from  
11 caspase 3 knockout cells. The full-length DFNB59 was also observed in the ApoExos. However, GSDMB could  
12 not be identified in the exosomes in any conditions (Fig. 2a). Thus, the gasdermins, including DFNA5, shown to  
13 promote the release of exosomes after apoptotic stimuli, need to be localized at the exosome in both their full-  
14 length and cleaved forms, and the negatively acting DFNB59 can be localized in the exosomes in its full-length  
15 form. To further confirm that point, we prepared exosomal membrane fractions and examined the localization of  
16 the gasdermins. We detected either the full-length or cleaved forms of GSDMA, GSDMC, GSDMD, DFNA5,  
17 and DFNB59 proteins in the exosomal membrane (Fig. S7). DFNA5 expression was also detected in our flow-  
18 cytometric analysis and in transmission EM images of exosomes (Fig. 2b and c).

19

#### 20 **Caspase-mediated cleavage of gasdermins is required for maximum biogenesis of ApoExos**

21 Next, we proposed that caspase-mediated cleavage and subsequent pore-formation were required for the  
22 gasdermin-mediated promotion of ApoExo biogenesis. To test that proposition, we replaced the Asp at the  
23 caspase-cleavage sites in DFNA5 and GSDMD with Glu to produce caspase-resistant mutants [9, 10, 14]. The  
24 cells expressing the mutant DFNA5 showed decreased release of exosomes and reduced cell death, but very  
25 interestingly, still induced the release of more exosomes and more cell death than in the control cells (Fig. 3b, c,  
26 and d). Consistently, the full-length DFNA5 mutants were able to be localized into the exosomes (Fig. 3a).  
27 However, in the cells expressing the GSDMD mutants, the release of exosomes was decreased to the levels of  
28 the control cells, and cell death decreased below the level of the control (Fig. 3f, g, and h). Neither the full-

1 length nor cleaved form of the GSDMD mutants was localized in the exosomal fractions (Fig. 3e), implying that  
2 DFNA5 and GSDMD work in caspase-dependent manners; however, intact DFNA5 also plays a role in the  
3 biogenesis of ApoExos and pyroptosis. To further search for the gasdermin domains, we expressed non-pore-  
4 forming constructs of DFNA5 [9] (Fig. 4 a and b). As shown in figure 4c and d, the non-pore-forming fragments  
5 of DFNA5 were unable to increase the release of exosomes. In addition, the partial fragments interfered slightly  
6 with cell death (Fig. 4e). Next, we introduced N-terminal constructs, including the pore-forming segment, into  
7 the cells as a cumate-inducible system (Fig. 4f). The cumate-mediated induction of the pore-forming N-terminal  
8 fragment showed a similar or even modestly decreased release of ApoExos (Fig. 4g), and the early cell death  
9 patterns differed insignificantly from those of the non-treated controls (Fig. 4h). In contrast, the induction of  
10 full-length DFNA5 increased both ApoExo release and early pyroptotic cell death (Fig. S8).

11 Taken together, these data suggest that caspase-mediated cleavage of gasdermins is important for the release  
12 of exosomes. Non-cleaved DFNA5 can increase the release of exosomes but not as efficiently as the cleaved  
13 form. This point is in accordance with a study reporting that gasdermins can be activated without caspase-  
14 mediated cleavage [15]. Intriguingly, the pore-forming N-terminal domain did not increase the release of the  
15 exosomes, indicating that the C-terminal auto-inhibitory domain is also essential for exosome biogenesis.

16

### 17 **DFNA5-mediated increase in the release of ApoExos is mediated by ESCRT complex activation**

18 When we compared cells depleted of DFNA5 with parental cells in apoptotic conditions under a confocal  
19 microscope, the DFNA5 knockout cells showed marked reduction in the size of the intracellular vesicles co-  
20 localized with CD63, although early apoptotic changes, including the formation of plasma membrane spikes and  
21 the movement of CD63 toward them [13], differed little between the two groups (Fig. 5a and S9). Those  
22 differences could also be seen in transmission EM. Apoptotic cells were characterized by large intracellular  
23 vesicles, possibly MVBs, which were barely detectable in the DFNA5 knockout cells (Fig. 5b). Thus, the  
24 number of intracellular vesicles larger than 1  $\mu\text{m}$  in diameter per cell was significantly reduced in the DFNA5  
25 knockout cells (Fig. 5c). When cells expressing DFNA5 with an internal or C-terminal Flag tag (Fig. S10), were  
26 treated with staurosporine, the DFNA5 was cleaved into N-terminal (30 kDa) and C-terminal domains (20 kDa)  
27 in a time-dependent manner, and the C-terminal domain was rapidly degraded (Fig. 5d). In confocal studies,  
28 however, DFNA5 proteins internally fused with mCherry (similar to GSDMD internally fused with a

1 fluorescence protein at the N-terminal region of the caspase-cleavage site in the linker domain [16] (Fig. S10))  
2 were exactly co-localized with CD63 as aggregates of large intracellular vesicles (Fig 5e). Therefore, the full-  
3 length and cleaved forms of DFNA5 are localized to MVBs during apoptotic processes and appear to be  
4 implicated in their maturation.

5 Next, we investigated whether the DFNA5-mediated maturation of MVBs depended on ESCRT complexes.  
6 To do that, we examined how a dominant-negative mutant of VPS4B, VPS4B E235Q [17], and deleted mutants  
7 of CHMP2A and CHMP3 at the C-terminal region, which functioned as dominant-negative forms of ESCRT  
8 complexes [18], affected the DFNA5-mediated increase of ApoExos. The expression of the dominant-negative  
9 mutants of VPS4B, CHMP2A, or CHMP3 (Fig. 6a and c) diminished the release of ApoExos (Fig. 6a-d).  
10 Furthermore, although the overexpression of DFNA5 in cells expressing dominant-negative mutants of ESCRT  
11 complex members (Fig 6e) slightly increased the exosome release, it did not reach the levels of other cells  
12 overexpressing DFNA5 (Fig 6e and f). As shown by confocal microscopy, DFNA5 with internal eGFP was co-  
13 localized with members of the ESCRT-III complex, CHMP2A or CHMP4B in the intracellular MVBs (Fig. 6g  
14 and S11). In addition, immunoprecipitation experiments demonstrated that full-length and N-terminal fragments  
15 of DFNA5 were able to bind to CHMP4B in apoptotic cells (Fig. 6h). Interestingly, the interaction between  
16 DFNA5 and CHMP4B depended on the presence of  $Ca^{2+}$  (Fig. S12). Thus, DFNA5-mediated mechanisms are  
17 used in the steps of MVB maturation through  $Ca^{2+}$ -dependent ESCRT activation.

18

### 19 **Annexins are implicated in the DFNA5-mediated increase in ApoExo biogenesis**

20 Given the  $Ca^{2+}$ -dependent interaction between DFNA5 and the ESCRT-III complex, it is reasonable to think  
21 that DFNA5 forms pores in the endosome through which  $Ca^{2+}$  migrates to increase the regional cytosolic  $Ca^{2+}$   
22 concentration, which in turn promotes the recruitment ESCRT-III [19]. To examine that notion, we tested the  
23 role of  $Ca^{2+}$  in DFNA5-mediated ApoExo production. Intracellular free  $Ca^{2+}$  was gradually decreased in both  
24 wild-type and DFNA5-depleted cells during early apoptotic cell death but transiently increased in cells  
25 overexpressing DFNA5 (Fig. S13). Co-treatment with an intracellular calcium chelator, BAPTA-AM, during  
26 staurosporine application blocked almost all of the ApoExo release in all the cells. However, co-treatment with a  
27 calcium ionophore, A23187, caused a considerable increase in ApoExo release in wild-type and DFNA5-  
28 depleted cells (Fig. 7a and b), however eliminated ApoExo release in DFNA5 overexpressing cells, indicating

1 that  $\text{Ca}^{2+}$  is essential for ApoExo release and the fine control of regional  $\text{Ca}^{2+}$  mediated by the DFNA5 pores is  
2 required for the biogenesis of ApoExos.

3 Next, we looked for the link connecting DFNA5-mediated regional  $\text{Ca}^{2+}$  increase with recruitment of the  
4 ESCRT-III complex. To do that, we explored the effects of annexin A2 (ANXA2) and annexin A7 (ANXA7),  
5 which are  $\text{Ca}^{2+}$ - and anionic phospholipid-binding proteins, on ApoExo release because ANXA2 and ANXA7  
6 were previously shown to be associated with the recruitment of the ESCRT-III complex in plasma membrane  
7 repair [20, 21]. We prepared post-nuclear cell lysates, conditioned media, conditioned media depleted of their  
8 exosomal fractions, and ApoExos from apoptotic cells and then compared the expression of ANXA2 or ANXA7  
9 among the groups. We found that both ANXA2 and ANXA7 were concentrated in the lysates of dead cells  
10 suggesting that they were located in the membrane fraction. In addition, ANXA2 was concentrated in the  
11 exosomal fractions, but ANXA7 was not (Fig. 7c). Depletion of either ANXA2 or ANXA7 (Fig. 7d) reduced the  
12 release of ApoExos (Fig. 7e and f). Furthermore, DFNA5 overexpression in ANXA2 or ANXA7 knockout cells  
13 partially restored ApoExo release but showed markedly reduced release compared with DFNA5 overexpression  
14 in wild-type cells (Fig. 7g and h). Immunoprecipitation of either ANXA2 or ANXA7 co-immunoprecipitated N-  
15 terminal DFNA5 domain in apoptotic cells (Fig. S14), and ANXA2 or ANXA7 was detected in the  
16 immunoprecipitates of DFNA5 (Fig. 7i). In the confocal images, ANXA2 or ANXA7 was co-localized with  
17 DFNA5 at the MVBs of apoptotic cells (Fig. S15). However, overexpression of ANXA2 or ANXA7 partially  
18 blocked ApoExo release (Fig. S16), indicating that DFNA5-induced endosomal pores invoke a cytosolic  
19 increase in  $\text{Ca}^{2+}$ , resulting in the recruitment of annexins to the endosomal membrane, though the maintenance  
20 of an adequate amount of annexin is needed during the process.

21

## 22 **Sorcin/grancalcin-HD-PTP recruits ESCRT-III to the MVBs, resulting in the biogenesis of ApoExos**

23 Based on a report demonstrating that  $\text{Ca}^{2+}$ -activated ANXA7 forms a complex with apoptosis linked gene 2  
24 (ALG2) and ALG2-interacting protein X (ALIX) to guide the ESCRT-III complex to the site of damage on a  
25 membrane [21], we wondered whether penta-EF hand (PEF)  $\text{Ca}^{2+}$ -binding proteins such as ALG2, peflin, sorcin,  
26 and grancalcin [22] could manage the release of ApoExos. As shown in Figure 8, overexpression of sorcin or  
27 grancalcin increased the release of ApoExos; in contrast, the overexpression of ALG2 or peflin eliminated the  
28 release of ApoExos (Fig. 8a and b). In addition, knockout of sorcin or grancalcin blocked the release of



1 ApoExos (Fig. S17). In agreement with those results, sorcin and grancalcin were co-localized with DFNA5 in  
2 the MVBs of apoptotic cells, but ALG2 and peflin were not (Fig. 8c). Sorcin and grancalcin also co-  
3 immunoprecipitated with ANXA2, ANXA7 and CHMP4B in apoptotic cells (Fig. 8d). Next, we investigated the  
4 effect of two Bro1 domain-containing proteins, ALIX and HD-PTP (His domain-containing protein tyrosine  
5 phosphatase), on the release of ApoExos. The Bro1 domain has been shown to bind to subunits of the ESCRT-III  
6 complex [23]. ALIX knockout did not decrease the release of ApoExos but instead increased it slightly (Fig.  
7 S18), consistent with a previous report [13]. The HD-PTP knockout cells reduced the release of ApoExos (Fig.  
8 8e and f). HD-PTP in apoptotic cells was co-localized with DFNA5 in the cytosolic MVBs (Fig. 8g). Subcellular  
9 fractionation studies revealed that cleaved DFNA5 and the full-length form migrated into both the plasma  
10 membrane-containing heavy membrane fraction (HMF) and the MVB-containing light membrane fraction  
11 (LMF) in apoptotic cells, although it existed mainly in the cytosolic fraction in the resting cells. In the LMFs,  
12 the cleaved DFNA5 was co-localized with ANXA2, ANXA7, sorcin, grancalcin, HD-PTP, and CHMP4B (Fig.  
13 S19).

14 Taken together, our results suggest that sorcin and grancalcin, activated by an increase in cytosolic  $Ca^{2+}$  bind  
15 to annexins, and form a complex with HD-PTP, which enhances the assembly of the ESCRT-III complex  
16 through its Bro1 domain to contribute to the formation of ILVs. Thus, the biogenesis of ApoExos requires  
17 gasdermin-mediated calcium flow and the subsequent formation of an annexin-sorcin/grancalcin-HD-PTP-  
18 ESCRT-III axis.

19

## 20 **DFNA5 overexpression enhances levels of ApoExos and inflammation in the 4T1 orthotopic breast** 21 **cancer model**

22 To confirm the biological significance of gasdermin-mediated ApoExo release, we investigated the effect of  
23 Dfna5 overexpression in the *in vivo* 4T1 orthotopic breast cancer model [24]. 4T1 cells stably-expressing  
24 Dfna5 increased ApoExo release (Fig. S20a and b). The cells were injected into the mammary fat pads of  
25 BALB/c mice. When the tumors reached 1,000 mm<sup>3</sup>, the mice were injected with the anticancer drugs  
26 cyclophosphamide and doxorubicin or PBS, and then plasma exosomes and inflammatory mediators in the liver  
27 tissue were analyzed. As shown in Supplementary Figure 20c, the growing tumors showed no influence on the  
28 total amount of exosome compared with control mice without tumors, but anticancer drug treatments increased

1 the absolute amount of plasma exosomes, even though the control tumors and Dfna5-overexpressing tumors did  
2 not differ. In contrast, ApoExos certainly increased in Dfna5-expressing tumors treated with anticancer drugs  
3 (Fig. S20d). Furthermore, the mice with Dfna5-expressing tumors induced more inflammatory mediators,  
4 including Il1b and Cox2, than found in the control groups (Fig. S20e and f). Thus, Dfna5 in mouse tumor tissues  
5 enhanced the release of ApoExos, which subsequently induced inflammatory responses in tumor-bearing mice,  
6 supporting previous findings on the inflammatory role of ApoExos [13, 25, 26].

7

## 1 **Discussion**

2 The proposed mechanisms for the gasdermin-mediated biogenesis of ApoExos supported by the data  
3 presented here are summarized in a schematic illustration (Fig. S21).

4 GSDMB and DFNB59 blocked the release of ApoExos, and DFNB59 also prohibited early cell death in all  
5 conditions (Fig. 1). Thus, GSDMB and DFNB59 probably prevent pore formation in the membrane via other  
6 gasdermins, which was an unexpected result because the overexpression of the GSDMB N-terminal domain  
7 induced cell death, and DFNB59 has an N-terminal domain similar to that of DFNA5 [15, 27]. Possibly, a single  
8 nucleotide polymorphism found in GSDMB or a mutation of DFNB59 would alleviate the inhibitory effect of  
9 both proteins on membrane-pore formation, which would contribute to inflammation and immune responses to  
10 autoantigens in association with asthma and autoimmune diseases or neurosensory hearing loss, respectively  
11 [28].

12 So far, it remains unclear how GSDMA and GSDMC could be processed to generate N-terminal domains  
13 [29]. From that point of view, our data show that GSDMA and GSDMC were cleaved by caspase 3 during  
14 apoptosis (Fig. 2). Similarly, we found that GSDMD could be cleaved by caspase 3, and DFNA5 was cleaved by  
15 another caspase to enhance cell death and release ApoExos (Fig. 2), although it had previously been shown to be  
16 cleaved only by caspase 3 [9]. Thus, our results suggest that various caspases or enzymes could cleave  
17 gasdermins.

18 According to the findings of this study, the gasdermin-mediated promotion of ApoExo biogenesis somewhat  
19 resembles that membrane repair process in its mechanisms. The gasdermin-mediated process has been shown to  
20 depend on cytosolic  $\text{Ca}^{2+}$  and the ESCRT-III complex, and it requires annexins, PEF family proteins,  
21 sorcin/grancalcin, and HD-PTP. Accordingly, annexins might confer a platform for gathering sorcin/grancalcin-  
22 HD-PTP and eventually ESCRT-III during the ILV formation stage of ApoExo biogenesis. That mechanism  
23 agrees with recent reports showing that either sorcin or grancalcin can bind to annexins [30, 31, 32]. Consistent  
24 with our findings, GSDMD has been reported to promote plasma membrane repair by recruiting the ESCRT-III  
25 complex, which prolongs the survival of a cell dying through pyroptosis [33]. Our data are also supported by the  
26 novel role of MLKL (mixed lineage kinase domain-like protein), a pore-forming protein in necroptosis, which  
27 regulates membrane repair [34] and promotes exosome biogenesis using  $\text{Ca}^{2+}$ -mediated ESCRT-III machinery  
28 [35].

1       Recent research has highlighted that gasdermins can affect the transition between apoptosis and pyroptosis  
2 [36]. Thus, it is noteworthy that immunologically, apoptosis can no longer be considered a quiescent type of cell  
3 death because from the beginning of apoptotic signaling, stressed cells or tissues can change their destinies to  
4 pyroptotic cell death by activating the gasdermins and thereby releasing their intracellular contents to adjacent  
5 cells to provoke inflammation and immune responses. As demonstrated in this study, the role of gasdermins in  
6 cell death is not confined to the transition between modes of death because the gasdermins can control the  
7 release of exosomes. Given that ApoExos are probably loaded with the contents of dying cells [37], they transfer  
8 information from dying cells to near or distant living cells and tissues, causing the regeneration of damaged  
9 tissues, pro- or anti- inflammatory effects, or the arousal of immune responses to autoantigens or cancer  
10 antigens [11, 12]. Therefore, a complete molecular understanding of the biogenetic mechanisms of ApoExos will  
11 be needed to comprehend the pathophysiologic events associated with apoptosis, which can then be used to  
12 develop novel therapeutic approaches.  
13

## 1 **Materials and Methods**

### 2 **Cells, antibodies, and other reagents**

3 HeLa cells (human cervical cancer) were cultured in minimal essential medium supplemented with 10% heat-  
4 inactivated FBS, 2 mM L-glutamine, 100 U/ml penicillin, and 100 µg/ml streptomycin. MCF7 (human breast  
5 cancer), U251 (human malignant glioblastoma), HEK 293T (human embryonic kidney), HepG2 (human  
6 hepatocellular cancer), and 4T1 (mouse breast cancer) cells were cultured in DMEM supplemented with 10%  
7 heat-inactivated FBS, 2 mM L-glutamine, 100 U/ml penicillin, and 100 µg/ml streptomycin. A549 (human lung  
8 cancer) cells were cultured in 10% FBS RPMI1640. Staurosporine, cycloheximide, and BAPTA-AM were  
9 purchased from Santa Cruz Biotechnology (Santa Cruz, CA). TNF $\alpha$  was purchased from Sino Biological  
10 (Beijing, China). Alexa Fluor 594-conjugated wheat germ agglutinin, Alexa Fluor 594-conjugated anti-mouse  
11 IgG Ab, and Alexa Fluor 594-conjugated anti-rabbit IgG Ab were purchased from Thermo Fisher Scientific  
12 (Seoul, Korea). A23187 was purchased from Sigma-Aldrich (Yongin, Korea). Anti-GSDMA and anti-GSDMB  
13 Abs were purchased from ProSci (Fort Collins, CO); anti-GSDMC, anti-GSDMD, and anti-DFNA5 Abs were  
14 from Proteintech (Rosemont, IL); anti-DFNB59 and anti-peflin Abs were from Novus Biologicals (Centennial,  
15 CO); anti-CD63, anti-S1PR3, anti-V5 Tag, anti-GAPDH, anti-ANXA7, anti-GFP, and anti-grancalcin Abs were  
16 from Santa Cruz Biotechnology; anti-S1PR1 Ab was from Merck Millipore (Seoul, Korea); anti-Flag M2 Ab,  
17 anti-Flag M2 affinity gel, and anti-V5 affinity gel were from Sigma Aldrich (Yongin, Korea); anti-ANXA2 Ab  
18 was from Cell Signaling Technology (Danvers, MA); anti-sorcin and anti-HD-PTP Abs were from Thermo  
19 Fisher Scientific (Seoul, Korea); and anti-CHMP4B Ab was from GeneTex (Hsinchu City, Taiwan).

20

### 21 **Expression constructs and lentiviral transfection**

22 CD63-pEGFP C2 was a gift from Paul Luzio (Addgene plasmid # 62964), and mCherry2-N1 was a gift from  
23 Michael Davidson (Addgene plasmid # 54517). Plasmids containing cDNAs of GSDMA, GSDMB, GSDMC,  
24 GSDMD, DFNA5, and DFNB59 were purchased from Sino-Biological (Beijing, China). The cDNAs of VPS4B,  
25 CHMP2A, CHMP3, ANXA2, ANXA7, ALG2, PEF1, sorcin, grancalcin, and HD-PTP were amplified from a  
26 mixture of HeLa cell cDNA. Dfna5 cDNA was amplified from a mixture of 4T1 cDNA. Constructs of cDNAs  
27 were cloned into pCDH-CMV-MCS-EF1-Puro, pCDH-CMV-MCS-EF1-Blast, pCDH-EF1-MCS-T2A-Puro, or  
28 pCDH-EF1-MCS-T2A-Blast with a C-terminal Flag tag, C-terminal V5 tag, or N-terminal Flag tag. Site-

1 directed mutagenesis of GSDMD and DFNA5 was performed using a Quick-change site-directed mutagenesis  
2 kit (Thermo Fisher Scientific). For construction of DFNA5 fusion cDNA, a BsaBI site was introduced into the  
3 linker domain sequence of DFNA5 located N-terminally from the D270 caspase-cleavage site by site-directed  
4 mutagenesis, and Flag oligonucleotides, eGFP cDNA, or mCherry cDNA were cloned at the position next to  
5 S252 of DFNA5 cDNA using an In-Fusion HD cloning kit (TaKaRa, Seoul, Korea). All the lentiviral vectors,  
6 pGagPol (Sigma Aldrich), and pVSVg (Sigma Aldrich) were transfected into 293TN cells (System Biosciences)  
7 using Lipofectamine 2000 transfection reagent (Thermo Fisher Scientific). Particles were collected on the 2<sup>nd</sup>  
8 and 3<sup>rd</sup> days after the transfection of the lentiviral plasmids and infected into the cells. Lentivirus-infected cells  
9 were puromycin- or blasticidin-selected for 2 weeks.

10

#### 11 **Cumate-inducible system for DFNA5 expression**

12 Complete or partial DFNA5 cDNA was cloned into PiggyBac Cumate Switch Inducible vectors (PB-Cuo-MCS-  
13 IRES-GFP-EF1-CymR-T2A-Puro or PB-Cuo-MCS-3XFlag-IRES-GFP-EF1-CymR-T2A-Puro) (System  
14 Biosciences, Palo Alto, CA). The vectors were transduced into HeLa cells using the PiggyBac transposon  
15 system (System Biosciences, Palo Alto, CA), and the cells were selected for 2 weeks with 2 µg/ml of puromycin.  
16 For induction of DFNA5 cDNA, the cells were incubated with cumate (30 µg / ml) for 48 hr, and the expression  
17 of DFNA5 was confirmed by western blotting.

18

#### 19 **CRISPR/Cas9 knockout and stable cell line generation**

20 The generation of stable knockout cell lines was achieved using the LentiCRISPRv2 system (one-vector system,  
21 Addgene #52961) or LentiGuide-Puro system (two-vector system, Addgene #52963 and #52962), which were  
22 gifts from Feng Zhang. A lentiviral plasmid containing guide RNA sequences was transfected into 293TN cells  
23 (System Biosciences) using Lipofectamine 2000 transfection reagent. Particles were collected 2 days after  
24 transfection of the lentiviral plasmids and infected into HeLa cells. The lentivirus-infected HeLa cells were  
25 puromycin-selected for 2 weeks and tested by western blotting to confirm gene knockout. Cells showing  
26 decreased or knocked-out expression of the target genes were used in further experiments.

27

#### 28 **Nanoparticle tracking analysis**

1 Conditioned media from cell culture supernatants or plasma from EDTA-treated whole mouse blood were  
2 diluted tenfold with PBS and then analyzed for the number and size of particles using NTAs performed with a  
3 ZetaView Nanoparticle Tracking Analyzer. The following tracking parameters were used: camera sensitivity  
4 (85), shutter (250), frame rate (30f/s), minimum brightness (30), maximum area (1,000), minimum area (10),  
5 and traces (12).

6

### 7 **LDH assay**

8 To detect pyroptosis among apoptotic cells, we performed the lactate dehydrogenase (LDH) assay according to  
9 the instructions of the manufacturer (Biovision, Milpitas, CA), with minor modification. Briefly, the cells were  
10 cultured in 24-well plates to more than 90% confluency and then treated with staurosporine (1  $\mu$ M) or TNF $\alpha$  (50  
11 ng/ml) and cycloheximide (5  $\mu$ g/ml) for 6 to 48 hr. The culture supernatants were collected by centrifugation of  
12 the conditioned media for 10 min at 600Xg. Cell lysates were taken from the cellular pellets after centrifugation  
13 of the conditioned media, and adherent cells were taken by lysis with 1% Triton X100 PBS. The LDH assay was  
14 performed by mixing 100  $\mu$ l of the diluted supernatants or cell lysate with 100  $\mu$ l of reconstituted catalyst  
15 solution in clear 96-well plates in triplicate, incubating them for 30 min at room temperature, and then  
16 measuring the absorbance at 490 nm. % cell death was calculated as follows: (absorbance of supernatant) /  
17 (absorbance of cell lysate + absorbance of supernatant) X 100.

18

### 19 **Preparation of exosomal fractions**

20 The conditioned media from apoptotic cells or mouse plasma diluted tenfold with PBS were centrifuged for 10  
21 min at 200Xg and for 20 min at 2,000Xg twice to remove cellular debris and apoptotic bodies. Then the pellets  
22 were collected and washed by ultracentrifugation at 100,000Xg for 70 min twice. For fractionation of the  
23 vesicular membrane, the exosomes were incubated on ice with 100mM Na<sub>2</sub>CO<sub>3</sub> (pH 11) for 1 hr, washed once,  
24 and resuspended in PBS.

25

### 26 **Confocal microscopy**

27 Cells grown on Lab-Tek four-well glass chamber slides (NUNC), were incubated in medium or medium  
28 containing staurosporine (1  $\mu$ M) for the indicated times. In some experiments, the cells were incubated with

1 Alexa Fluor 594–conjugated wheat germ agglutinin (2.5 µg/ml) for 10 min at 37 °C and washed twice with  
2 HBSS. The cells were fixed with 4% paraformaldehyde and permeabilized with 0.2% Triton X100 PBS or fixed  
3 with methanol. The fixed cells were stained with the appropriate Ab and mounted with DAPI-containing  
4 mounting medium (Vector Laboratories Ltd, Peterborough, UK). Images were collected using a laser scanning  
5 confocal microscope LSM710 (Carl Zeiss, Oberkochen, Germany) equipped with argon (488 nm) and krypton  
6 (568 nm) lasers and using a x40 water immersion objective. Images were processed with ZEN 2009 light edition  
7 (Carl Zeiss).

8

### 9 **Transmission electron microscopy (TEM) and immunogold labeling**

10 Cells were pelleted and washed twice with PBS. Fixation was performed with phosphate buffer (pH 7.4)  
11 containing 2.5% glutaraldehyde for 30 min at 4 °C. The pellets were rinsed twice with cold PBS, post-fixed in  
12 buffered OsO<sub>4</sub>, dehydrated in graded acetone, and embedded in Durcupan ACM resin (Fluka, Yongin, Korea).  
13 Ultrathin sections were obtained, mounted in copper grids, and counterstained with uranyl acetate and lead  
14 citrate. The specimens were observed with a Hitachi H-7600 TEM (Schaumburg, IL, USA) at 80 kV. The  
15 exosomes were resuspended in PBS, deposited onto formvar carbon-coated nickel grids for 60 min, washed with  
16 PBS, and fixed with 2% paraformaldehyde for 10 min. The exosome-coated grids were washed with PBS,  
17 transferred to a drop of the antibody, and incubated for 40 min for the immunogold labeling with anti-DFNA5  
18 antibody. The grids were washed with 0.1% BSA/PBS, incubated with 10 nm-gold labeled goat-anti-rabbit IgG  
19 for 40 min, washed in PBS, and then post-fixed with 2.5% glutaraldehyde for 10 min. After washing in  
20 deionized water, the grids were stained with 2% uranyl acetate for 15 min and with 0.13% uranyl acetate and 0.4%  
21 methylcellulose for 10 min, air-dried for 5 min, and viewed by TEM.

22

### 23 **Flow-cytometric analysis of exosomes**

24 20 µg of exosomes were coated onto 5 µl of aldehyde/sulfate latex beads (4 µm in diameter) for 15 min at room  
25 temperature in PBS, with a final volume of 20 µl. The beads were then washed with 1 ml of PBS with shaking  
26 for 1 hr, blocked by incubation with 20 µl of FBS for 30 min, and washed thrice in PBS. The beads were  
27 resuspended in 50 µl of PBS and incubated with anti-DFNA5 Ab or isotype-matched irrelevant Ab for 1 hr at  
28 room temperature. After being washed thrice with PBS, the beads were incubated with PE-conjugated secondary



1 Ab (Santa Cruz Biotechnology, Santa Cruz, CA) for 1 hr at room temperature. Finally, the beads were analyzed  
2 by flow cytometry using a FACSCalibur flow cytometer (Becton Dickinson, Mountain View, CA) and FlowJo  
3 software.

4

#### 5 **Preparation of cell lysates and western blots**

6 To prepare the lysates, cells and exosome pellets were lysed in lysis buffer (50 mM Tris-Cl, pH 7.5, 150 mM  
7 NaCl, 1 mM EDTA, 1% Triton X100, 1 mM Na<sub>3</sub>VO<sub>4</sub>, 1 mM NaF, 1 µg/ml pepstatin A, 10 µg/ml AEBSF,  
8 2 µg/ml aprotinin, and 1 µg/ml leupeptin), incubated on ice for 20 min, and centrifuged for 20 min to remove the  
9 supernatants. The lysates were subjected to SDS-PAGE. The proteins were then electro-transferred to PVDF  
10 membranes and incubated overnight with antibodies at 4 °C. Subsequently, the membranes were incubated with  
11 peroxidase-conjugated secondary antibodies (Pierce, Rockford, IL, USA) for 1 h at room temperature, and the  
12 signal was detected using an enhanced chemiluminescence detection kit (Amersham Biosciences, Seongnam,  
13 Korea).

14

#### 15 **Immunoprecipitation**

16 Cells ( $1 \times 10^7$  cells) were lysed using 1 ml of lysis buffer (250 mM sucrose, containing 10 mM HEPES, pH 7.4,  
17 0.1% Triton X-100, 1 mM Na<sub>3</sub>VO<sub>4</sub>, 1 mM NaF, 1 µg/ml pepstatin A, 10 µg/ml AEBSF, 2 µg/ml aprotinin, and  
18 1 µg/ml leupeptin) with and without 100 µM CaCl<sub>2</sub> for 30 min at 4 °C and then centrifuged for 20 min at 13,000  
19 rpm at 4 °C. The supernatants were stored at -70 °C. The cell lysates were precleared with protein A/G-Agarose  
20 (Santa Cruz Biotechnology, Santa Cruz, CA) by incubation for 1 h at 4 °C with constant agitation. The  
21 precleared lysates were then incubated for overnight with anti-Flag M2 affinity agarose or anti-V5 affinity  
22 agarose at 4 °C. The immunoprecipitates were washed six times in PBS. An aliquot of each sample was  
23 subjected to western blot analysis.

24

#### 25 **4T1 orthotropic breast cancer model**

26 All animal experiments were performed following guidelines of and protocols approved by the *Laboratory*  
27 *Animal Research Center of Ajou University Medical Center*, Suwon, South Korea. Female BALB/c mice (8  
28 weeks old) weighing 25 g were purchased from OrientBio (Seongnam, Korea). 4T1 cells ( $2 \times 10^6$  cells) were

1 injected into their mammary fat pads. Around 3 weeks after tumor injection, when the tumors had reached 1,000  
2 mm<sup>3</sup>, the mice were injected intraperitoneally with PBS or cyclophosphamide monohydrate (BioVision,  
3 Milpitas, CA) (50 mg / kg) and doxorubicin hydrochloride (Santa Cruz Biotechnology) (3 mg / kg) twice with  
4 an interval of 24 hr. 24 hr after the last injection, the animals were sacrificed, and their livers, flushed with ice-  
5 cold PBS, and spleens were resected. The whole blood from the mice was collected by heart puncture, and the  
6 plasma was separated.

7

### 8 **Real-time PCR**

9 Total RNA was isolated using an RNeasy kit (Qiagen, Seoul, Korea). A PrimeScript RT reagent kit (TaKaRa,  
10 Seoul, Korea) was used to reverse-transcribe mRNA into cDNA. PCR was then performed on a QuantStudio 3  
11 machine (Thermo Fisher Scientific) using SYBR Premix Ex Taq II (TaKaRa). The analysis of each sample in  
12 triplicate was performed more than twice for each experiment, and data in the figures are reported as relative  
13 quantification: average values of  $2^{-\Delta\Delta CT} \pm S.D.$

14

### 15 **Measurements of intracellular free calcium ions**

16 Intracellular free Ca<sup>2+</sup> was measured using Calcium Sensor Dye eFluor<sup>TM</sup> 514 (eBiosciences, San Diego, CA,  
17 USA). Briefly, cells were incubated for 30 min at 37 °C in medium containing 10 μM eFluor<sup>TM</sup> 514 and then  
18 washed twice. Fluorescence was measured at an excitation wavelength of 490 nm and an emission wavelength  
19 of 514 nm with a FLUOstar Optima Microplate Fluorometer (BMG Labtech, Cary, NC, USA). Data are  
20 presented as relative fluorescence: MFI of treated cells / MFI of non-treated cells.

21

### 22 **Subcellular fractionation by differential centrifugation**

23 Preparation of the LMF and HMF was performed as described previously [38] with modifications. HeLa cells  
24 were homogenized in sucrose buffer (250 mM sucrose, 10 mM HEPES, pH 7.4, 0.1 mM CaCl<sub>2</sub>) with protease  
25 inhibitors (1 mM Na<sub>3</sub>VO<sub>4</sub>, 1 mM NaF, 1 μg/ml pepstatin A, 10 μg/ml AEBSF, 2 μg/ml aprotinin, and 1 μg/ml  
26 leupeptin) by passing them through a 21-gauge needle. The homogenates were centrifuged at 1,200 X g for 5  
27 min to pellet the nuclear fraction and broken cellular debris. The supernatants were further centrifuged at 15,000  
28 X g for 10 min to separate the HMF and post-nuclear supernatants. The post-nuclear supernatants were then

1 centrifuged for 1.5 h at 130,000 X g to isolate the LMF and cytosolic fraction.

2

### 3 **Statistical analyses**

4 The values are presented as the mean  $\pm$  S.D. Statistical analyses were performed using one-way analysis of  
5 variance (ANOVA) with either all pairwise multiple comparisons or multiple comparisons versus control  
6 (Holm-Sidak method). Statistical significance was considered at the  $P < 0.05$  level.

7

## 1   **References**

- 2   1. He WT, Wan H, Hu L, Chen P, Wang X, Huang Z, et al. Gasdermin D is an executor of pyroptosis and  
3       required for interleukin-1beta secretion. *Cell Res.* 2015;25:1285-98.
- 4   2. Kayagaki N, Stowe IB, Lee BL, O'Rourke K, Anderson K, Warming S, et al. Caspase-11 cleaves gasdermin  
5       D for non-canonical inflammasome signalling. *Nature.* 2015;526:666-71.
- 6   3. Shi J, Zhao Y, Wang K, Shi X, Wang Y, Huang H, et al. Cleavage of GSDMD by inflammatory caspases  
7       determines pyroptotic cell death. *Nature.* 2015;526:660-5.
- 8   4. Mitra S, Exline M, Habyarimana F, Gavrillin MA, Baker PJ, Masters SL, et al. Microparticulate Caspase 1  
9       Regulates Gasdermin D and Pulmonary Vascular Endothelial Cell Injury. *Am J Respir Cell Mol Biol.*  
10      2018;59:56-64.
- 11   5. Sarhan J, Liu BC, Muendlein HI, Li P, Nilson R, Tang AY, et al. Caspase-8 induces cleavage of gasdermin  
12      D to elicit pyroptosis during Yersinia infection. *Proc Natl Acad Sci U S A.* 2018;115:E10888-E97.
- 13   6. Kambara H, Liu F, Zhang X, Liu P, Bajrami B, Teng Y, et al. Gasdermin D Exerts Anti-inflammatory  
14      Effects by Promoting Neutrophil Death. *Cell Rep.* 2018;22:2924-36.
- 15   7. Sollberger G, Choidas A, Burn GL, Habenberger P, Di Lucrezia R, Kordes S, et al. Gasdermin D plays a  
16      vital role in the generation of neutrophil extracellular traps. *Sci Immunol.* 2018;3.
- 17   8. Chen KW, Demarco B, Broz P. Beyond inflammasomes: emerging function of gasdermins during apoptosis  
18      and NETosis. *EMBO J.* 2020;39:e103397.
- 19   9. Rogers C, Fernandes-Alnemri T, Mayes L, Alnemri D, Cingolani G, Alnemri ES. Cleavage of DFNA5 by  
20      caspase-3 during apoptosis mediates progression to secondary necrotic/pyroptotic cell death. *Nat Commun.*  
21      2017;8:14128.
- 22   10. Wang Y, Gao W, Shi X, Ding J, Liu W, He H, et al. Chemotherapy drugs induce pyroptosis through  
23      caspase-3 cleavage of a gasdermin. *Nature.* 2017;547:99-103.
- 24   11. Baxter AA. Stoking the Fire: How Dying Cells Propagate Inflammatory Signalling through Extracellular  
25      Vesicle Trafficking. *Int J Mol Sci.* 2020;21.
- 26   12. Kakarla R, Hur J, Kim YJ, Kim J, Chwae YJ. Apoptotic cell-derived exosomes: messages from dying cells.  
27      *Exp Mol Med.* 2020;52:1-6.
- 28   13. Park SJ, Kim JM, Kim J, Hur J, Park S, Kim K, et al. Molecular mechanisms of biogenesis of apoptotic

- 1 exosome-like vesicles and their roles as damage-associated molecular patterns. *Proc Natl Acad Sci U S A*.  
2 2018;115:E11721-E30.
- 3 14. Liu X, Zhang Z, Ruan J, Pan Y, Magupalli VG, Wu H, et al. Inflammasome-activated gasdermin D causes  
4 pyroptosis by forming membrane pores. *Nature*. 2016;535:153-8.
- 5 15. Ding J, Wang K, Liu W, She Y, Sun Q, Shi J, et al. Pore-forming activity and structural autoinhibition of  
6 the gasdermin family. *Nature*. 2016;535:111-6.
- 7 16. Rathkey JK, Benson BL, Chirieleison SM, Yang J, Xiao TS, Dubyak GR, et al. Live-cell visualization of  
8 gasdermin D-driven pyroptotic cell death. *J Biol Chem*. 2017;292:14649-58.
- 9 17. Scheuring S, Rohricht RA, Schoning-Burkhardt B, Beyer A, Muller S, Abts HF, et al. Mammalian cells  
10 express two VPS4 proteins both of which are involved in intracellular protein trafficking. *J Mol Biol*.  
11 2001;312:469-80.
- 12 18. Shim S, Kimpler LA, Hanson PI. Structure/function analysis of four core ESCRT-III proteins reveals  
13 common regulatory role for extreme C-terminal domain. *Traffic*. 2007;8:1068-79.
- 14 19. Scheffer LL, Sreetama SC, Sharma N, Medikayala S, Brown KJ, Defour A, et al. Mechanism of Ca<sup>2+</sup>(+)-  
15 triggered ESCRT assembly and regulation of cell membrane repair. *Nat Commun*. 2014;5:5646.
- 16 20. Hager SC, Nylandsted J. Annexins: players of single cell wound healing and regeneration. *Commun Integr*  
17 *Biol*. 2019;12:162-65.
- 18 21. Sonder SL, Boye TL, Tolle R, Dengjel J, Maeda K, Jaattela M, et al. Annexin A7 is required for ESCRT  
19 III-mediated plasma membrane repair. *Sci Rep*. 2019;9:6726.
- 20 22. Maki M, Kitaura Y, Satoh H, Ohkouchi S, Shibata H. Structures, functions and molecular evolution of the  
21 penta-EF-hand Ca<sup>2+</sup>-binding proteins. *Biochim Biophys Acta*. 2002;1600:51-60.
- 22 23. Bissig C, Gruenberg J. ALIX and the multivesicular endosome: ALIX in Wonderland. *Trends Cell Biol*.  
23 2014;24:19-25.
- 24 24. Paschall AV, Liu K. An Orthotopic Mouse Model of Spontaneous Breast Cancer Metastasis. *J Vis Exp*.  
25 2016.
- 26 25. Dieude M, Bell C, Turgeon J, Beillevaire D, Pomerleau L, Yang B, et al. The 20S proteasome core, active  
27 within apoptotic exosome-like vesicles, induces autoantibody production and accelerates rejection. *Sci*  
28 *Transl Med*. 2015;7:318ra200.

- 1 26. Hardy MP, Audemard E, Migneault F, Feghaly A, Brochu S, Gendron P, et al. Apoptotic endothelial cells  
2 release small extracellular vesicles loaded with immunostimulatory viral-like RNAs. *Sci Rep.* 2019;9:7203.
- 3 27. Broz P, Pelegrin P, Shao F. The gasdermins, a protein family executing cell death and inflammation. *Nat*  
4 *Rev Immunol.* 2020;20:143-57.
- 5 28. Kovacs SB, Miao EA. Gasdermins: Effectors of Pyroptosis. *Trends Cell Biol.* 2017;27:673-84.
- 6 29. Zheng Z, Deng W, Lou X, Bai Y, Wang J, Zeng H, et al. Gasdermins: pore-forming activities and beyond.  
7 *Acta Biochim Biophys Sin (Shanghai).* 2020;52:467-74.
- 8 30. Ilari A, Fiorillo A, Poser E, Lalioti VS, Sundell GN, Ivarsson Y, et al. Structural basis of Sorcin-mediated  
9 calcium-dependent signal transduction. *Sci Rep.* 2015;5:16828.
- 10 31. Li H, Liu N, Wang S, Wang L, Zhao J, Su L, et al. Identification of a small molecule targeting annexin A7.  
11 *Biochim Biophys Acta.* 2013;1833:2092-9.
- 12 32. Xi Y, Ju R, Wang Y. Roles of Annexin A protein family in autophagy regulation and therapy. *Biomed*  
13 *Pharmacother.* 2020;130:110591.
- 14 33. Ruhl S, Shkarina K, Demarco B, Heilig R, Santos JC, Broz P. ESCRT-dependent membrane repair  
15 negatively regulates pyroptosis downstream of GSDMD activation. *Science.* 2018;362:956-60.
- 16 34. Gong YN, Guy C, Olauson H, Becker JU, Yang M, Fitzgerald P, et al. ESCRT-III Acts Downstream of  
17 MLKL to Regulate Necroptotic Cell Death and Its Consequences. *Cell.* 2017;169:286-300 e16.
- 18 35. Yoon S, Kovalenko A, Bogdanov K, Wallach D. MLKL, the Protein that Mediates Necroptosis, Also  
19 Regulates Endosomal Trafficking and Extracellular Vesicle Generation. *Immunity.* 2017;47:51-65 e7.
- 20 36. Tsuchiya K. Switching from Apoptosis to Pyroptosis: Gasdermin-Elicited Inflammation and Antitumor  
21 Immunity. *Int J Mol Sci.* 2021;22.
- 22 37. Li SP, Lin ZX, Jiang XY, Yu XY. Exosomal cargo-loading and synthetic exosome-mimics as potential  
23 therapeutic tools. *Acta Pharmacol Sin.* 2018;39:542-51.
- 24 38. Taha MS, Nouri K, Milroy LG, Moll JM, Herrmann C, Brunsveld L, et al. Subcellular fractionation and  
25 localization studies reveal a direct interaction of the fragile X mental retardation protein (FMRP) with  
26 nucleolin. *PLoS One.* 2014;9:e91465.

27

1 **Acknowledgments**

2

3 **Funding Statement:** This research was supported by the Basic Science Research Program through the National  
4 Research Foundation of Korea (NRF) funded by the Ministry of Education (NRF-2020R1F1A1071081), by a  
5 grant of the Korean Health Technology R&D Project through the Korean Health Industry Development Institute  
6 (KHIDI) funded by the Ministry of Health & Welfare, Republic of Korea (grant number: HI16C0992), and by a  
7 grant (RA202004-13-C3) from the Jeonbuk Research and Development Program funded by Jeonbuk Province.

8

9 **Conflict of Interest Statement:** All the authors declare that they have no competing interests.

10

11 **Author Contribution Statement:** J.H., Y.J.K., D.A.C., D.W.K., and J.K. performed most of experiments. H.S.Y.  
12 performed the animal studies. S.A.S. performed the transmission EM, the flow cytometry and the DFNB59  
13 experiments. T.M. and D.Y.K. wrote the paper with assistance from all authors. Y.J.C. designed the experimental  
14 concept and the individual experimental plans, and wrote the paper.

15

16 **Availability of Data and Materials:** All data needed to evaluate the conclusions in the paper are present in the  
17 paper and/or the Supplementary Materials. Further information and requests for resources and reagents should  
18 be directed to the corresponding author, Y.J.C ([soiloie0603@hanmail.net](mailto:soiloie0603@hanmail.net)).

19

## 1 **Figure Legends**

2

3 **Fig. 1 Gasdermins modulate the release of ApoExos.** HeLa cells overexpressing a gasdermin protein and  
4 control cells were treated with staurosporine (1  $\mu$ M) or TNF $\alpha$  (50 ng/ml) plus cycloheximide (25  $\mu$ g/ml). HeLa  
5 cells depleted of caspase 3 and overexpressing a gasdermin were treated with staurosporine for 24 hr. **a, d, and g**  
6 ApoExos were prepared and western blotting was performed with equal volumes of exosomes for markers of  
7 ApoExos (CD63, S1PR1, or S1PR3). **b, e, and h** Equal volumes of the exosomal fractions were measured in a  
8 nanoparticle-tracking analysis (NTA). **c, f, and i** % cell death was calculated from the cells at the indicated times.  
9 \* P < 0.001 and \*\* P < 0.01.

10

11 **Fig. 2 Gasdermins promoting the release of ApoExos are localized to those ApoExos in both their full-**  
12 **length and cleaved forms.** **a** HeLa cells or caspase 3 knockout HeLa cells were made to overexpress a  
13 gasdermin (*GSDMA*, *GSDMB*, *GSDMC*, *GSDMD*, *DFNA5*, or *DFNB59*) or a transfected control vector (*Vector*).  
14 Those cells and parental HeLa cells were treated with staurosporine (1  $\mu$ M) or TNF $\alpha$  (50 ng/ml) and  
15 cycloheximide (25  $\mu$ g/ml) for 24 hr. The cell lysates and ApoExos were prepared, and western blotting was  
16 performed with equal amounts of protein for each gasdermin (C: cell lysates from non-treated control cells; S:  
17 cell lysates from staurosporine-treated cells; T: cell lysates from TNF $\alpha$  and cycloheximide-treated cells; A:  
18 lysates from the ApoExos). Arrows denote the full-length form of each gasdermin, and triangles denote the  
19 cleaved form of each gasdermin. **b** ApoExos from HeLa and DFNA5-overexpressing HeLa cells were coated  
20 onto aldehyde/sulfate beads and stained with anti-DFNA5 Ab (blue) or negative control Ab (red) to confirm the  
21 surface expression of DFNA5. **c** TEM images of the ApoExos stained with anti-DFNA5 Ab and a secondary Ab  
22 tagged with gold particles. Arrows indicate DFNA5s stained with gold particles.

23

24 **Fig. 3 Mutation of caspase-cleavage sites in gasdermins partially blocked gasdermin-induced**  
25 **enhancement of apoptotic exosome release.** **a** and **e** Control cells (*HeLa* or *Vector*) and cells overexpressing  
26 wild-type (*WT*) or mutant of either DFNA5 or GSDMD (*D270E* or *D275E*), were treated with staurosporine (1  
27  $\mu$ M) for 24 hr. the exosomal fractions were purified. Equal amounts of non-treated control cell lysates (C),  
28 staurosporine-treated cell lysates (S), and ApoExos (A) were analyzed by western blotting for DFNA5 or



1 GSDMD. Arrows and triangles denote full-length and cleaved forms of gasdermin, respectively. **b, c, f, and g**  
2 Equal volumes of the exosomal fraction were western-blotted for markers of ApoExos (S1PR1, S1PR3, or  
3 CD63) and examined by NTA. **d and h** 12 hr after treatment, pyroptotic cell death was measured by the LDH  
4 assay. \* P < 0.001 and \*\* P < 0.01.

5  
6 **Fig. 4 Full-length forms of DFNA5 protein are required for biogenesis of ApoExos. a, left panel** Various  
7 constructs containing complete or partial cDNA sequences of DFNA5, as shown in the schematic diagram were  
8 infected into HeLa cells. **b** The cells were confirmed to express complete or partial cDNA of DFNA5 by western  
9 blotting with anti-Flag Ab. Arrows denote the full-length form, and triangles indicate fragmented forms of  
10 DFNA5. **c and d** Equal volumes of the ApoExos were analyzed by western blotting to examine the markers for  
11 ApoExos and by NTA to measure the concentration of exosomal particles. **e** pyroptotic cell death was detected  
12 by the LDH assay 12 hr after the staurosporine treatment. **a, right panel** Partial or complete sequences of  
13 DFNA5 containing a pore-forming N-terminal segment were cloned into a cumate-inducible vector and stably  
14 expressed in HeLa cells. **f, upper panel** The cells were incubated in 20 µg/ml of cumate for 48 hr to induce the  
15 expression of the DFNA5 constructs, which was confirmed by western blotting. **f, lower panel and g** Then, the  
16 ApoExos were examined by western blotting and NTA. **h** Cell death was measured by the LDH assay around 12  
17 hr after the treatment. \* P < 0.001, \*\* P < 0.01, and \*\*\*P<0.5.

18  
19 **Fig. 5 DFNA5 is involved in the maturation of multivesicular endosomes during apoptotic exosome**  
20 **biogenesis. a** HeLa cells (*HeLa*) and HeLa cells depleted of DFNA5 (*DFNA5 KO*) expressing eGFP-CD63 were  
21 treated with staurosporine (1 µM) for 5 hr. The cells were then stained with wheat germ agglutinin conjugated  
22 with Alexa Fluor 594 (*WGA*) to visualize the plasma membrane. **b and c** HeLa cells and cells deprived of  
23 DFNA5 were treated with staurosporine (1 µM) for 7 hr, and then TEM images were made. One representative  
24 image from each group is shown. Intracellular vesicles more than 1 µm in diameter were counted in 20  
25 individual cells from each group. **d** HeLa cells expressing DFNA5 tagged with internal or C-terminal Flag  
26 [*DFNA5(Flag)* or *DFNA5-Flag*] were treated with staurosporine. DFNA5 was immunoprecipitated and western  
27 blotted for Flag. Arrows and triangles denote the full-length and cleaved forms of DFNA5, respectively.  
28 Asterisks indicate immunoglobulin light chains. **e** HeLa cells expressing eGFP-CD63 and DFNA5 with internal

1 mCherry [DFNA5(*mCherry*)] were treated with DMSO or staurosporine (1  $\mu$ M) for 5 hr. Confocal images are  
2 shown.

3

4 **Fig. 6 DFNA5-mediated promotion of apoptotic exosome biogenesis is executed through the activation of**  
5 **ESCRT complexes. a and b** Control cells and cells overexpressing mutant VPS4B (*VPS4B E235Q*) (**a, upper**  
6 **panel**) were treated with staurosporine (1  $\mu$ M) for 24 hr. ApoExos were analyzed by western blotting (**a, lower**  
7 **panel**) and NTA (**b**). **c and d** Cells overexpressing partial CHMP2A or CHMP3 (*CHMP2A-180* or *CHMP3-179*)  
8 (**c, upper panel**) were incubated in staurosporine for 24 hr, and the ApoExos were analyzed by western blotting  
9 (**c, lower panel**) and NTA (**d**). **e and f** Control cells and cells expressing mutants of CHMP2A or CHMP3 were  
10 infected with an empty vector or DFNA5 cDNA, and their expression of DFNA5 or the mutant CHMP2A or  
11 CHMP3 was confirmed by western blotting (**e, upper panel**). Exosomes from cells treated with staurosporine  
12 for 24 hr were examined by western blotting (**e, lower panel**) and NTA (**f**). **g** Cells overexpressing DFNA5 with  
13 internal eGFP and CHMP2A fused with mCherry were treated with staurosporine or solvent for 5 hrs. Confocal  
14 images are shown. **h** Cells were incubated with staurosporine for the indicated times. DFNA5 was  
15 immunoprecipitated with anti-Flag Ab, and western blotting was performed using anti-V5 or anti-Flag in the  
16 post-nuclear lysates containing  $Ca^{2+}$ . Arrows and triangles denote the full-length and cleaved N-terminal  
17 fragments of DFNA5, respectively. # denotes CHMP4B tagged with V5, and asterisks denote heavy and light  
18 chains of Ig. \*P < 0.001 (**b, d, and f**).

19

20 **Fig. 7  $Ca^{2+}$ /anionic phospholipid-binding proteins, annexins are implicated in DFNA5-mediated increase**  
21 **in apoptotic exosome biogenesis. a and b** Vector-infected HeLa cells, cells overexpressing DFNA5, and  
22 DFNA5 KO cells were treated with staurosporine (1  $\mu$ M) for 24 hr with solvent, BAPTA-AM (50  $\mu$ M), or  
23 A23187 (1  $\mu$ g/ml), and then ApoExos were prepared from the conditioned media. The exosomes were analyzed  
24 by western blotting (**a**) and NTAs (**b**). **c** The total cellular lysate (*Stau*), concentrated conditioned media (*C'*  
25 *Media*), conditioned media depleted in the exosomal fractions [*C' Media Exo(-)*], and ApoExos (*Exo*) were  
26 prepared from HeLa cells treated with staurosporine for 24 hr and compared with control cell lysate (*Control*)  
27 by western blotting with the indicated Abs. **d** Depletion of ANXA2 or ANXA7 was confirmed by western  
28 blotting in ANXA2 and ANXA7 knockout cells, which were treated with staurosporine for 24 hr. **e and f** The

1 ApoExos were purified and analyzed by NTAs and western blotting. **g, upper panel** Wild-type cells, ANXA2-  
2 depleted, and ANXA7-depleted cells were infected with DFNA5-eGFP cDNA or an empty vector, and their  
3 lysates were western-blotted with the indicated Abs. **g, lower panel** and **h** The ApoExos were western-blotted  
4 for CD63, S1PR1, or S1PR3, and measured by NTAs. **i** Cells expressing DFNA5(Flag) and ANXA2-V5 were  
5 incubated with a solvent control or staurosporine for 4 hr, and then their lysates were immunoprecipitated with  
6 anti-Flag Ab (*IP: Flag*) and western-blotted with anti-V5 Ab or anti-Flag Ab. One-hundredth volume of the  
7 lysates was western blotted with anti-V5 Ab or anti-Flag Ab (*Input*). Asterisks indicate Ig heavy and light chains.  
8 Arrow and triangle indicate full-length and the N-terminal domain of DFNA5, respectively. \*P < 0.001 (**b, e,**  
9 **and h**).

10

11 **Fig. 8 Sorcin/grancalcin-HD-PTP-ESCRT-III axis is associated with the maturation of MVBs in the**  
12 **biogenesis of ApoExos. a, upper panel** Genes of the PEF family were overexpressed, and their expression was  
13 confirmed by western blotting. **a, lower panel** and **b** ApoExos were measured by western blotting and NTAs. **c**  
14 Cells were treated with solvent or staurosporine for 4 hr, after which confocal images were made. **d** Cells  
15 expressing ANXA2-Flag or ANXA7-Flag were lysed after staurosporine treatment (1  $\mu$ M) for the indicated  
16 times and immunoprecipitated with anti-Flag Ab. The immunoprecipitates were western-blotted with the  
17 indicated Abs (*IP: Flag*). 1/100 volume of the lysate was western-blotted with the indicated Abs (*INPUT*). **e,**  
18 **upper panel** HeLa cells depleted of HD-PTP by the CRISPR/Cas9 system and control cells were western-  
19 blotted for HD-PTP. **e, lower panel** and **f** Then, ApoExos were analyzed by western blotting and by NTAs. **g**  
20 Cells expressing DFNA5(eGFP) were treated with staurosporine for 4 hr and stained for HD-PTP, and then  
21 confocal images were taken. \*P < 0.001(**a and f**).

22

# Figure 1

**a**

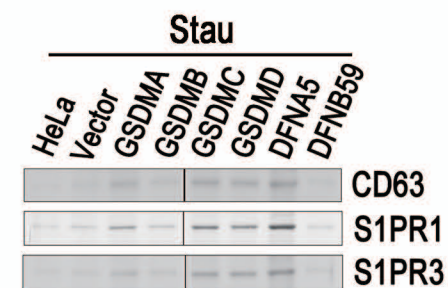

**b**

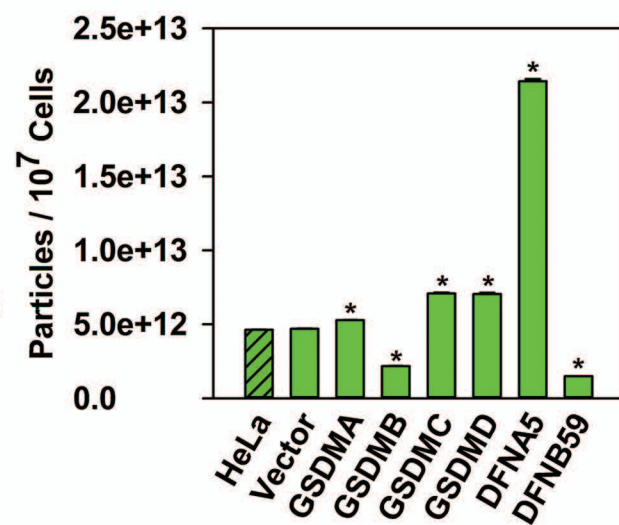

**c**

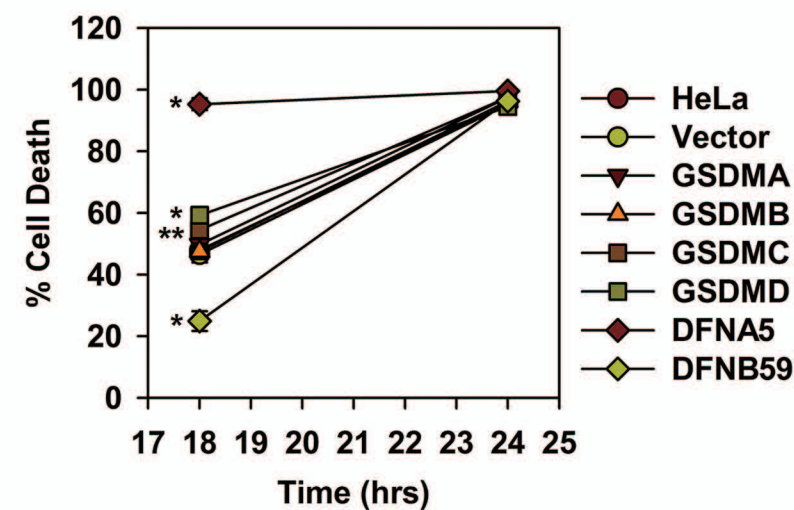

**d**

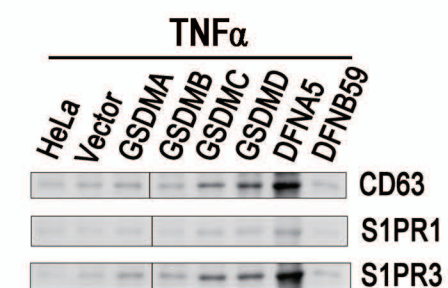

**e**

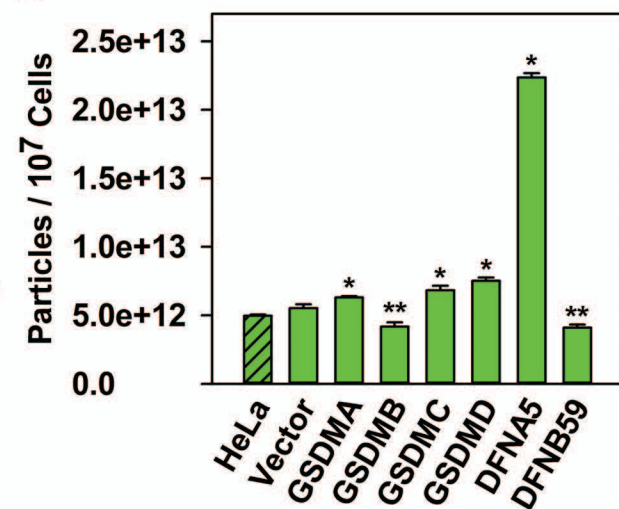

**f**

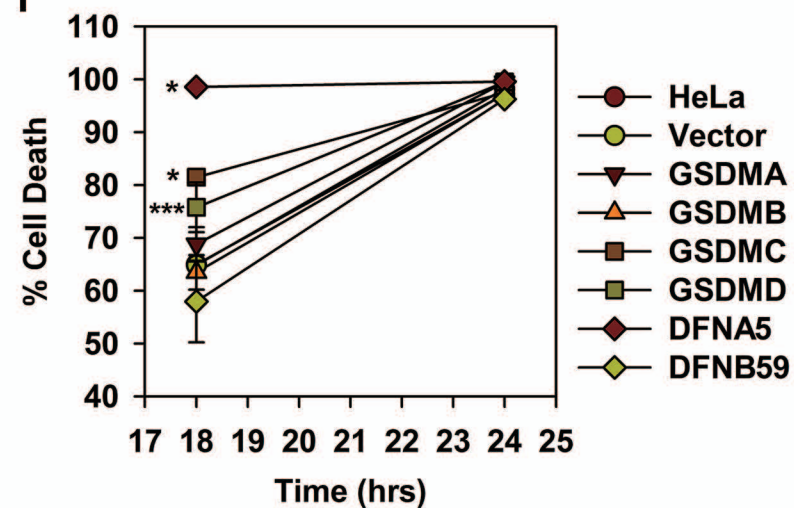

**g**

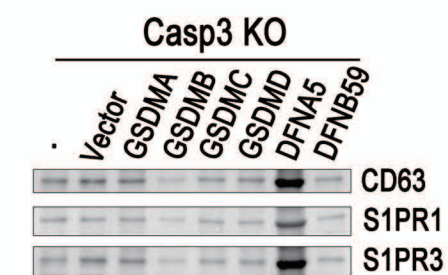

**h**

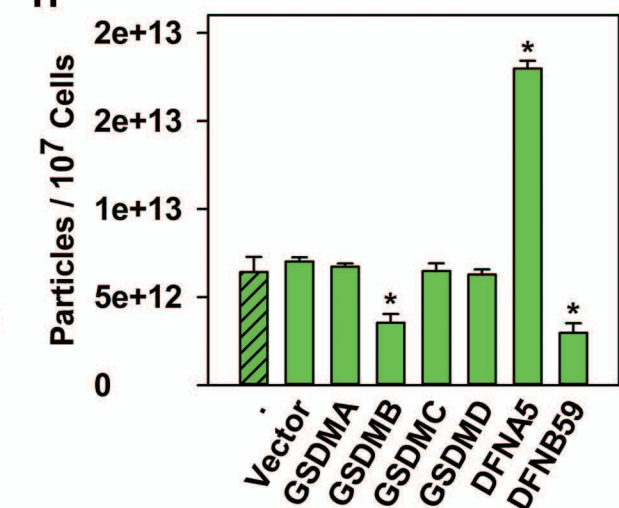

**i**

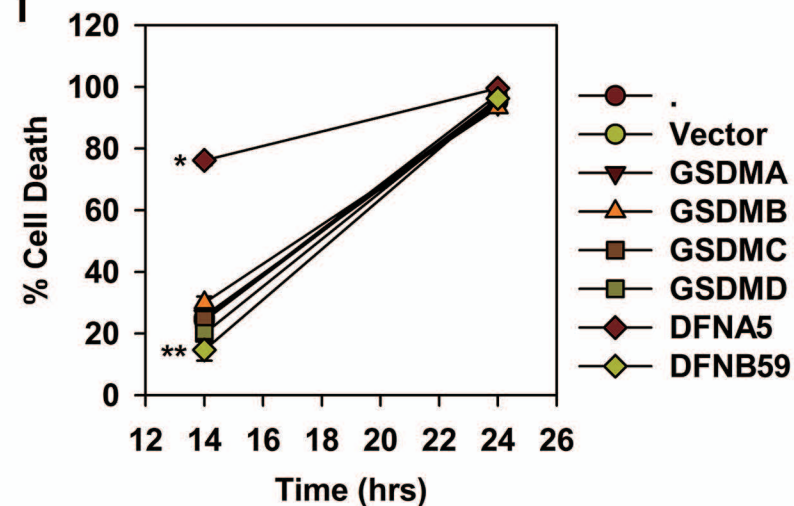



**Figure 2****a**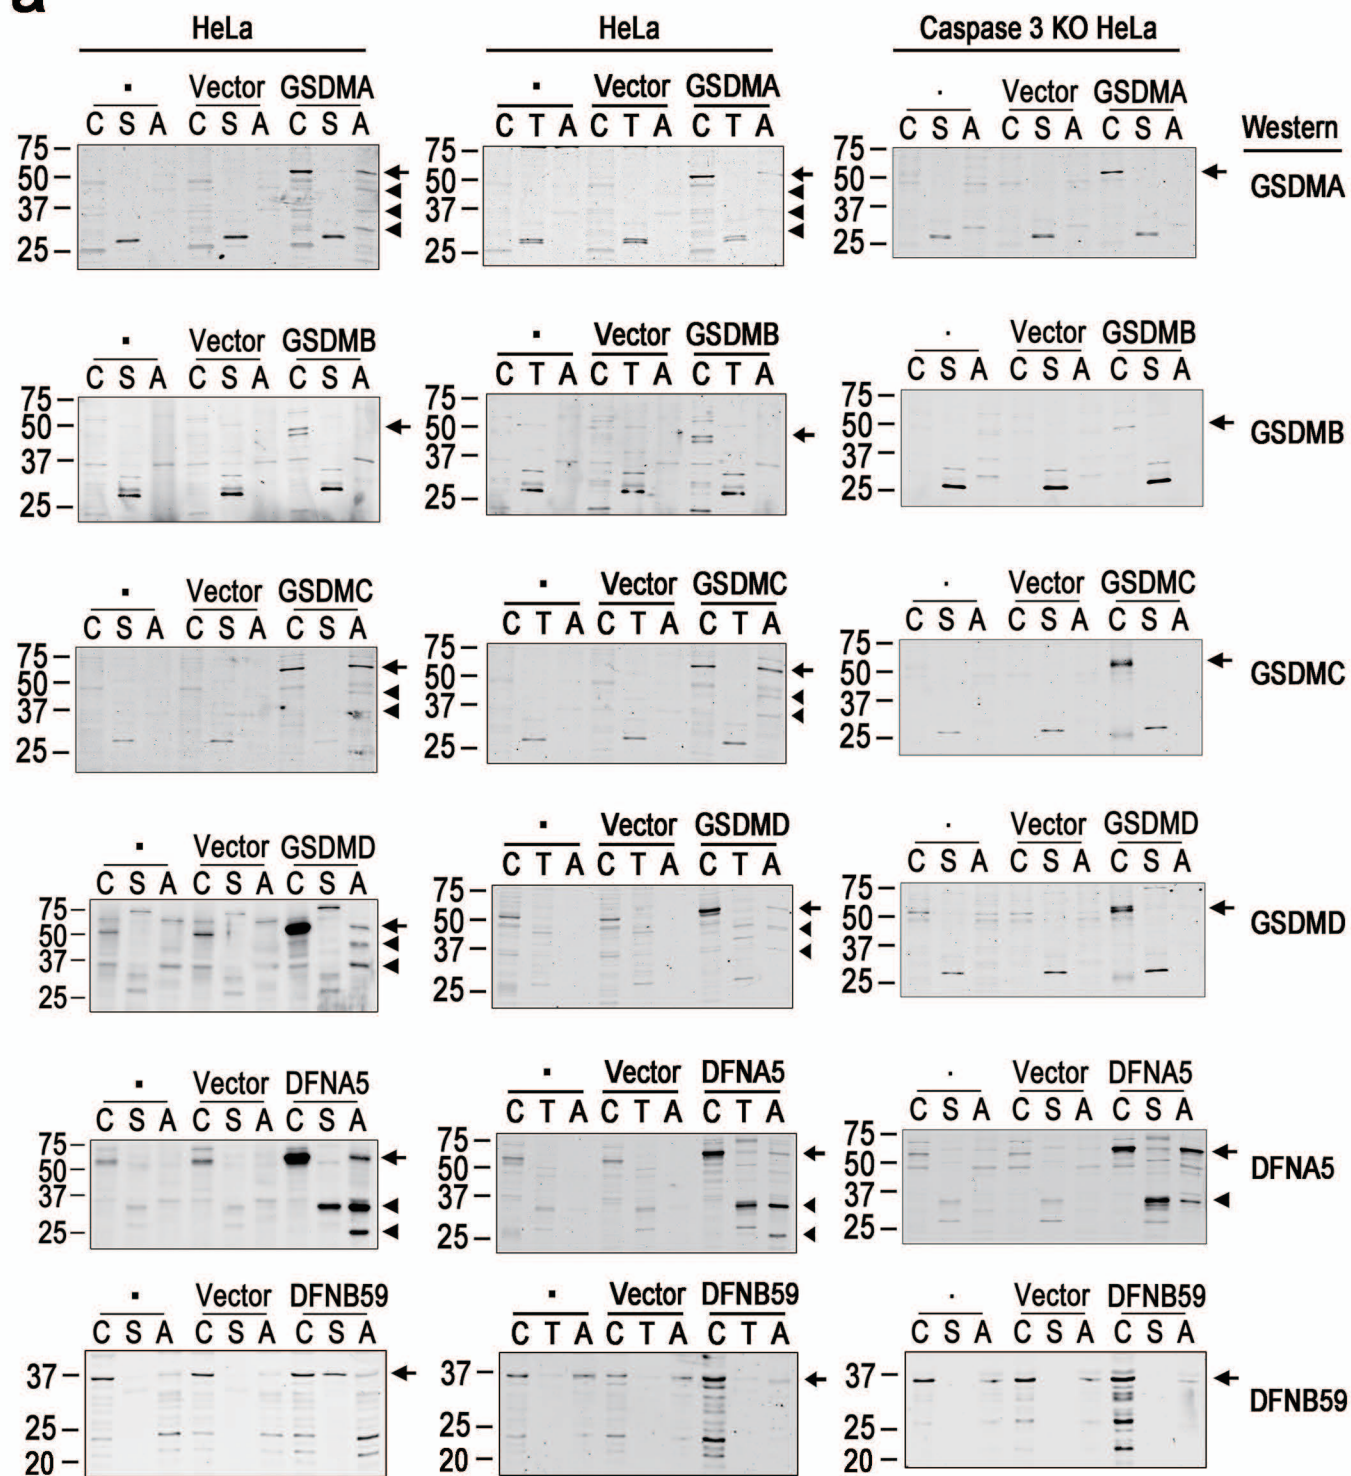**b**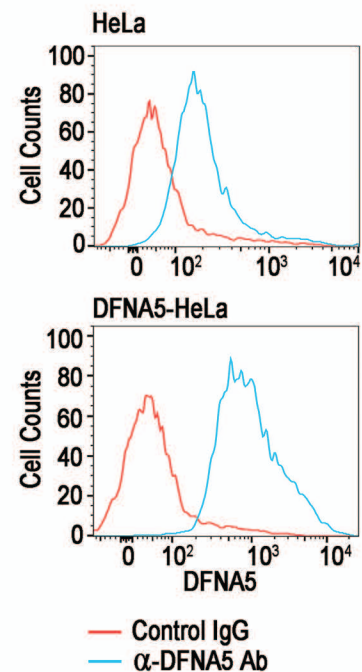**c**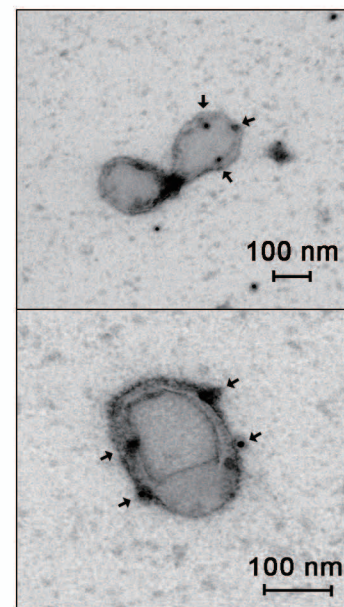

# Figure 3

**a**

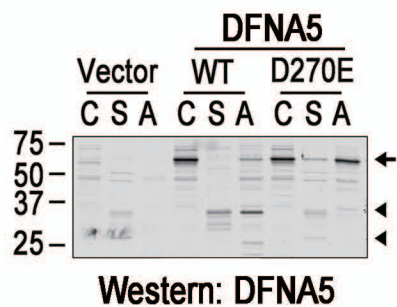

**b**

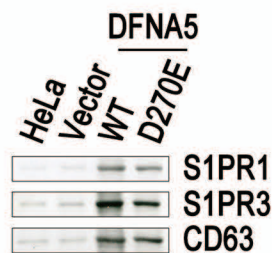

**c**

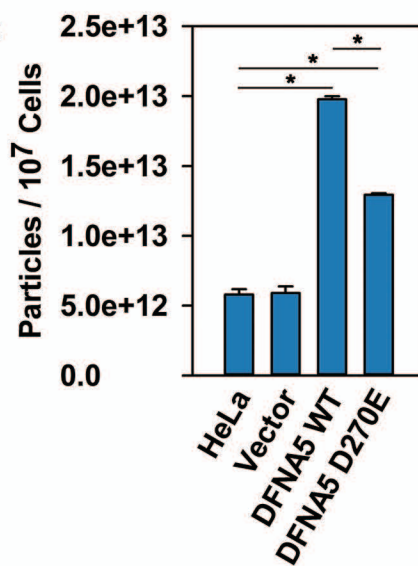

**d**

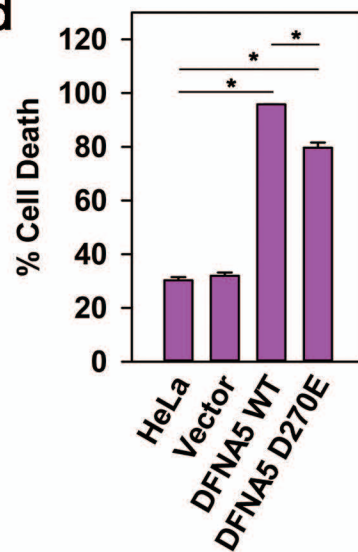

**e**

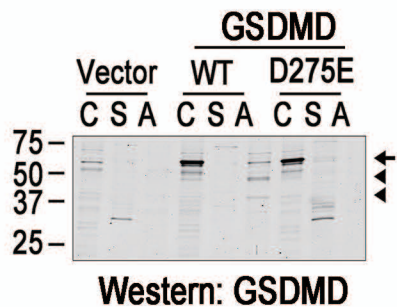

**f**

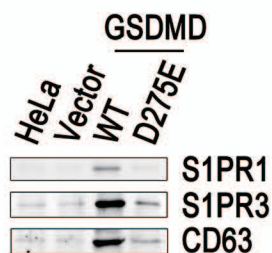

**g**

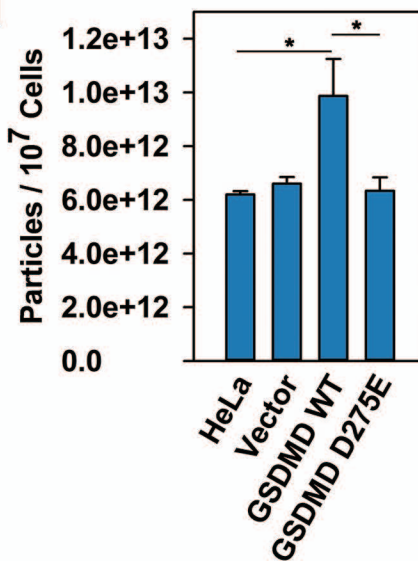

**h**

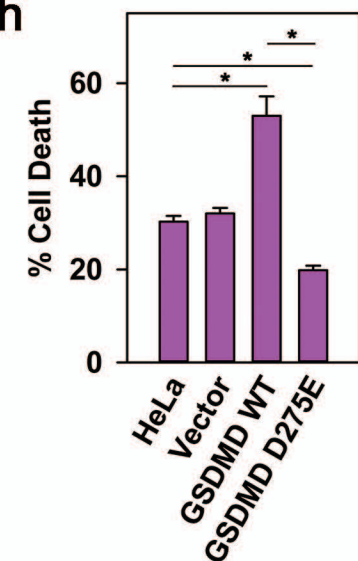



**Figure 4****a**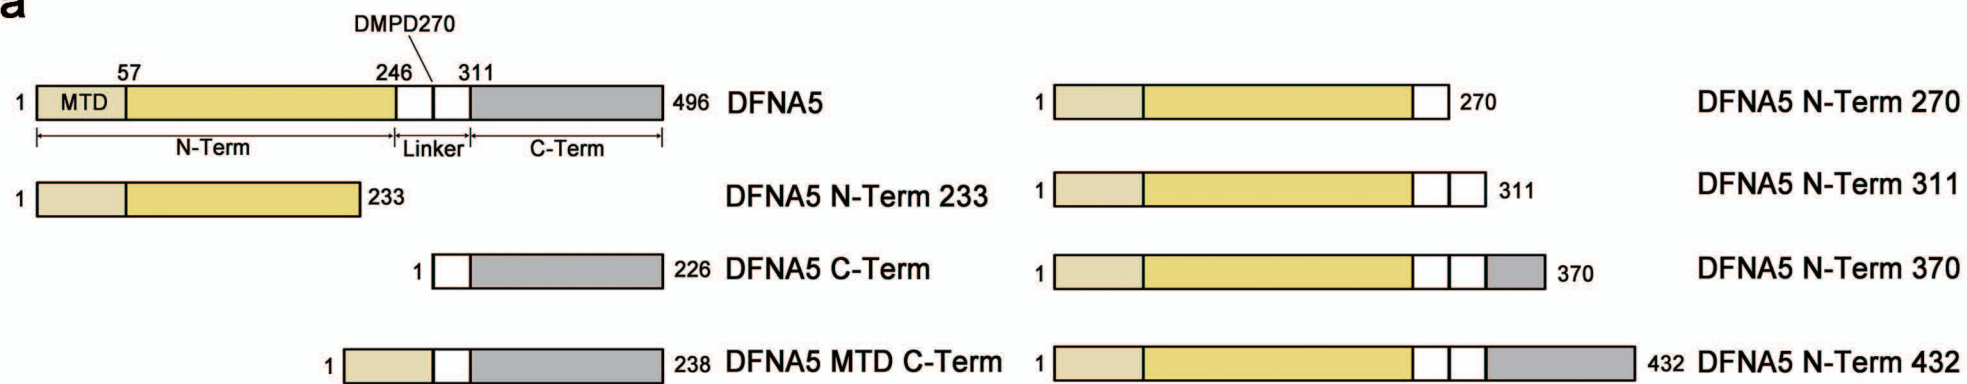**b**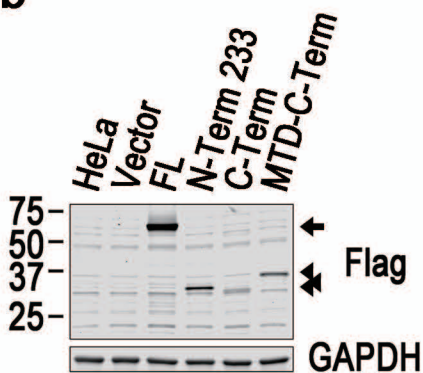**c**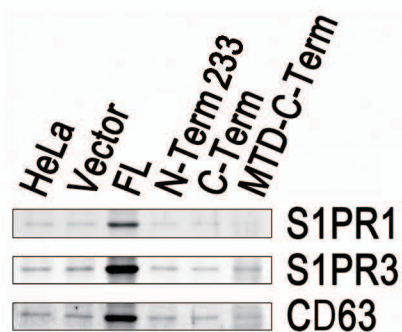**d**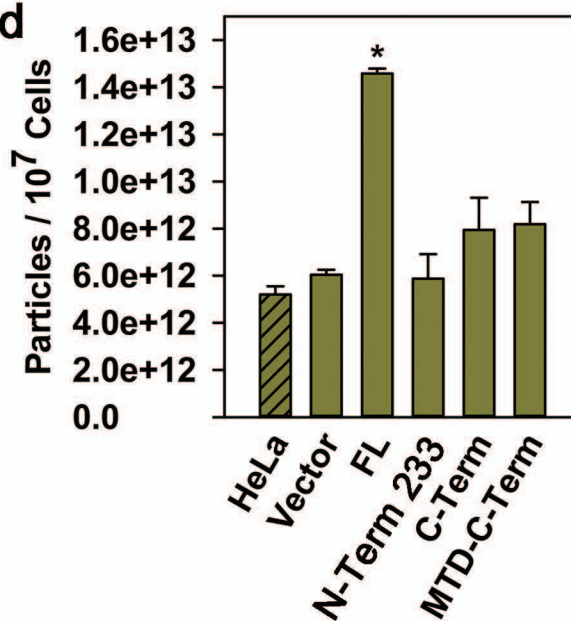**e**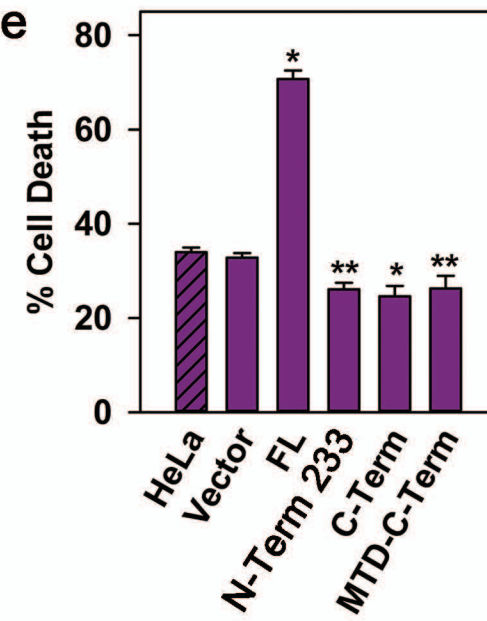**f**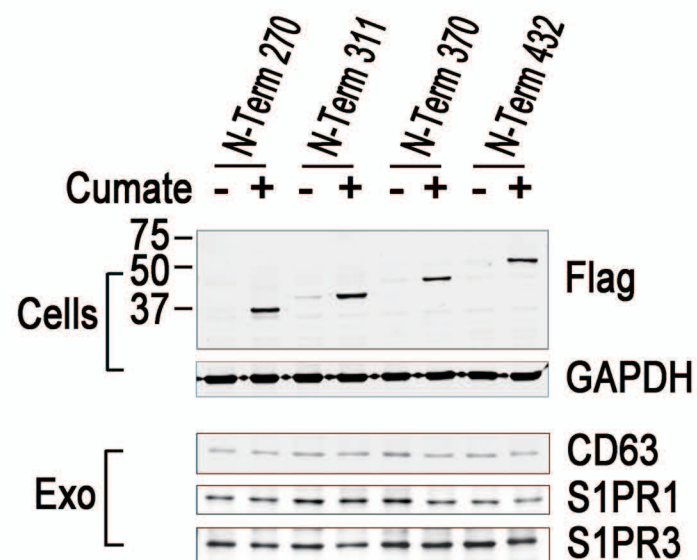**g**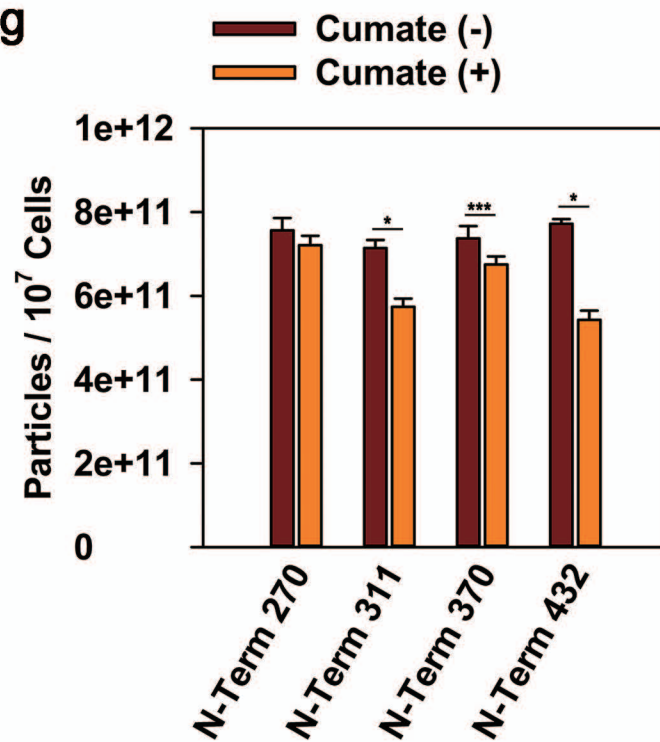**h**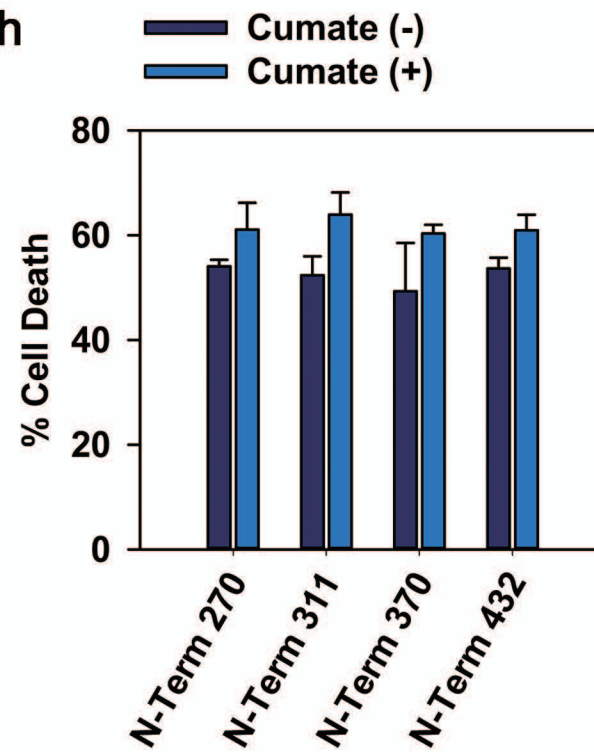

# Figure 5

**a**

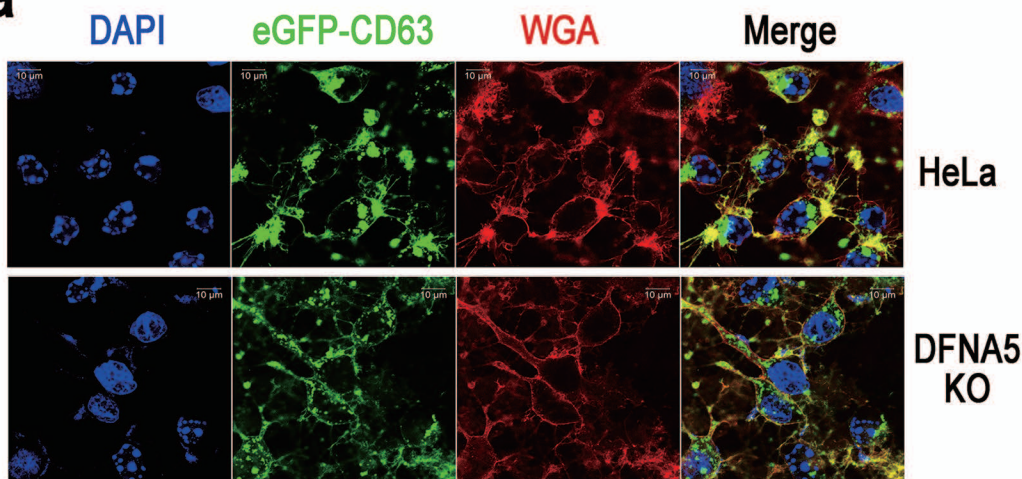

**b**

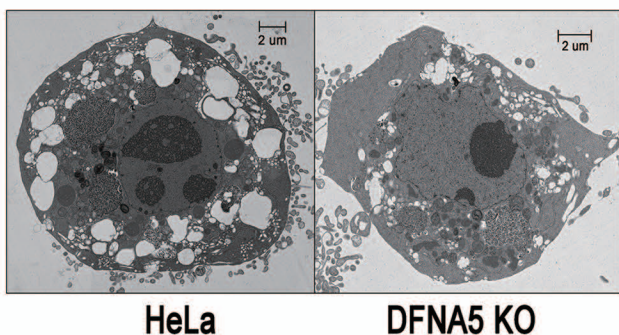

**c**

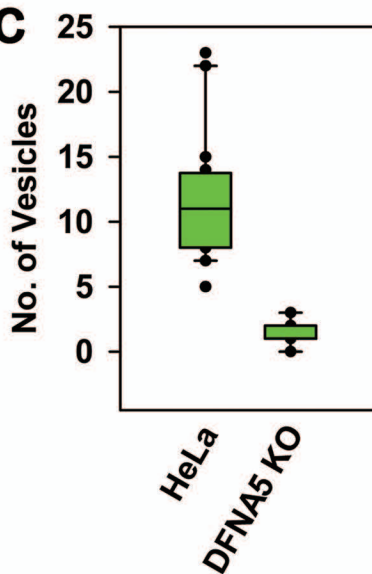

**d**

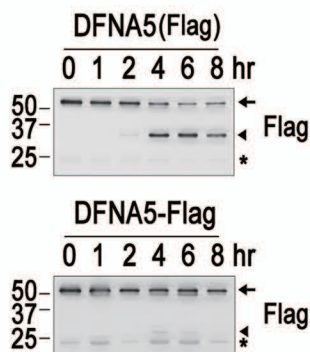

**e**

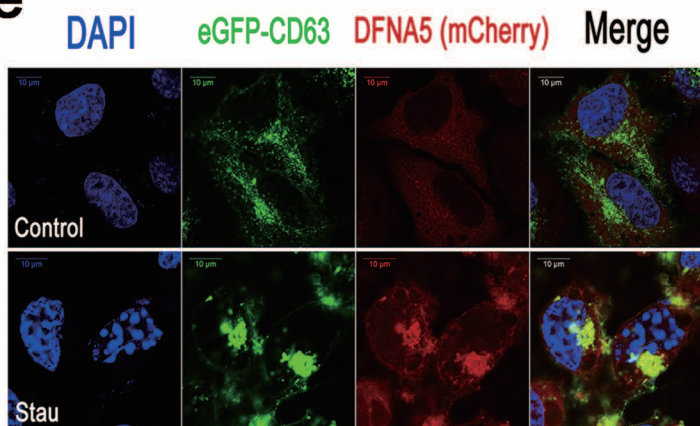



# Figure 6

**a**

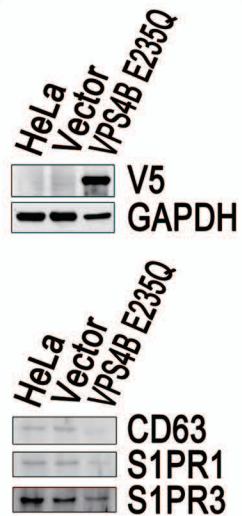

**b**

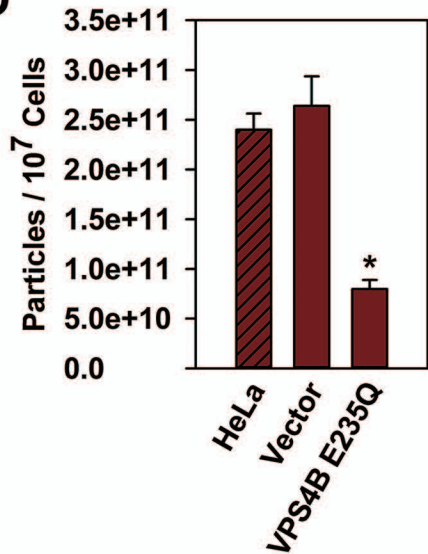

**c**

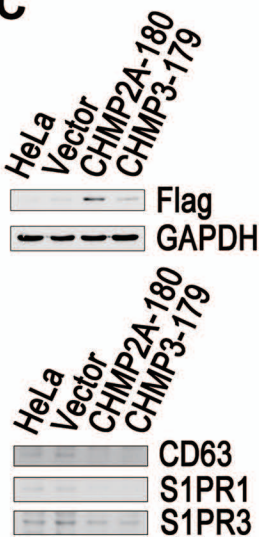

**d**

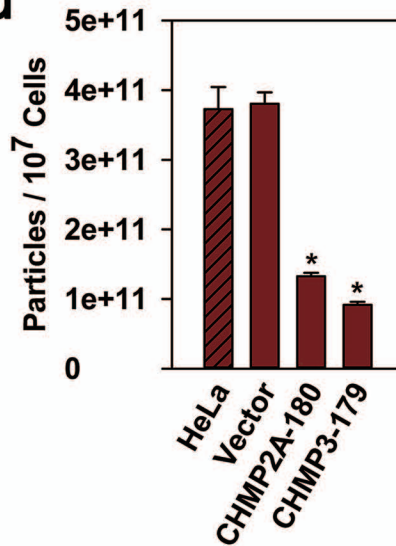

**e**

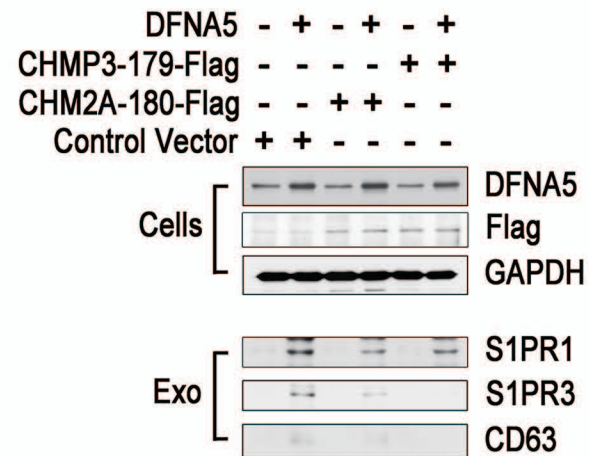

**f**

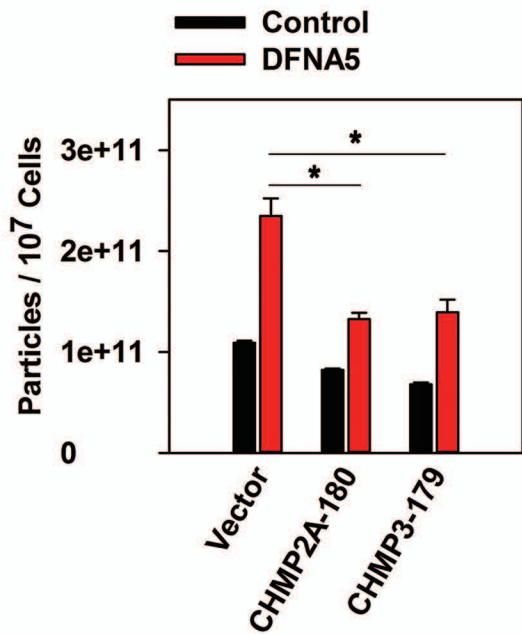

**g**

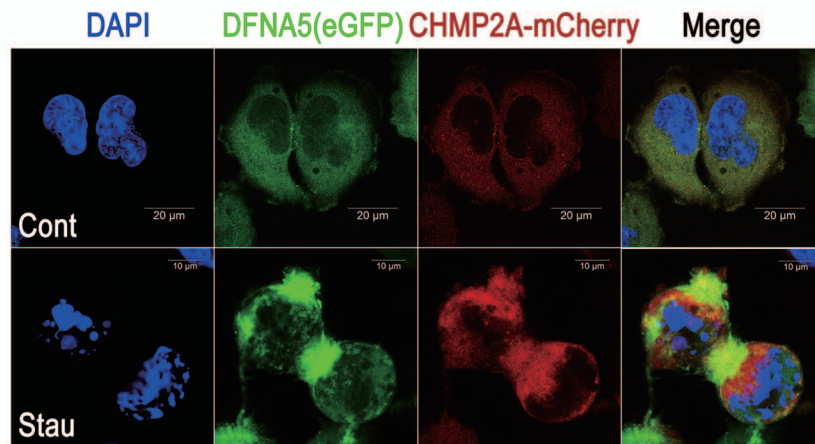

**h**

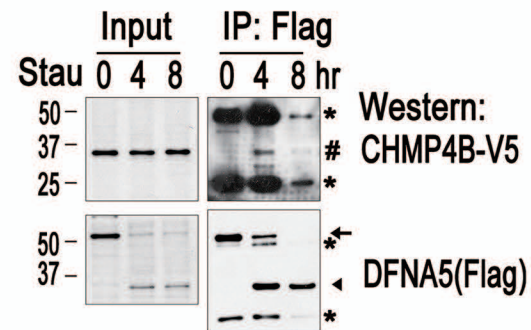

**Figure 7**

**a**

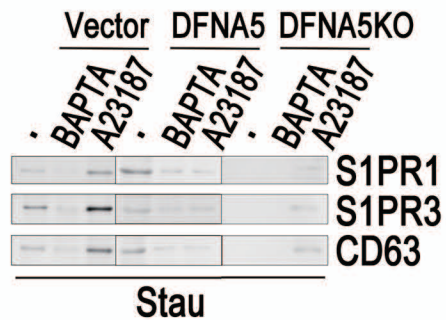

**b**

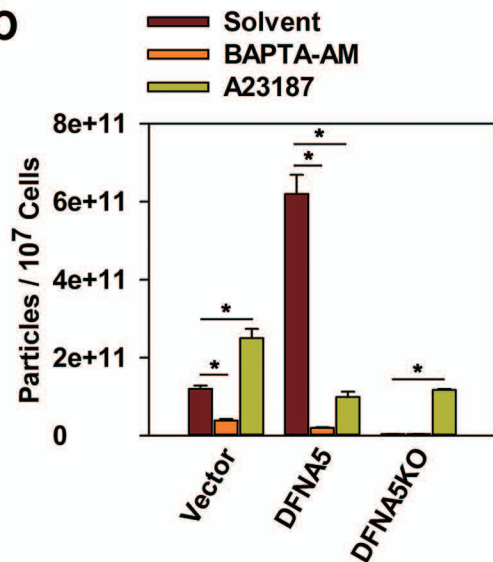

**c**

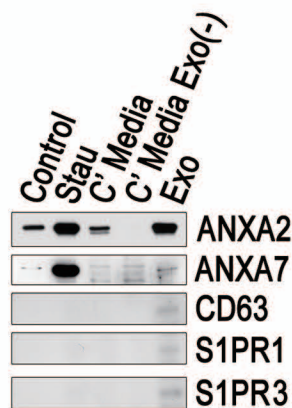

**d**

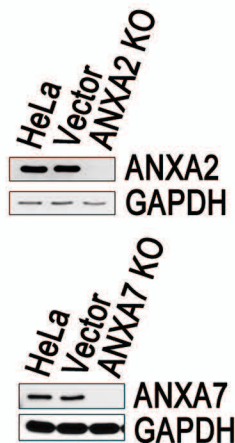

**e**

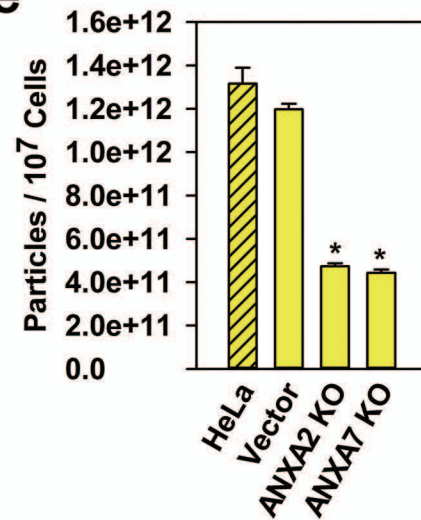

**f**

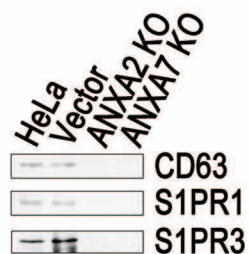

**g**

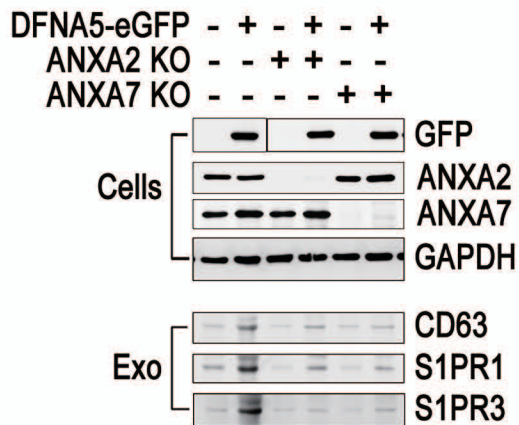

**h**

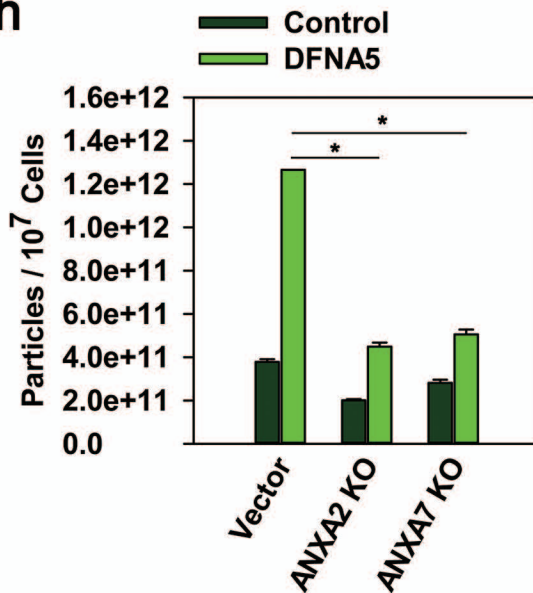

**i**

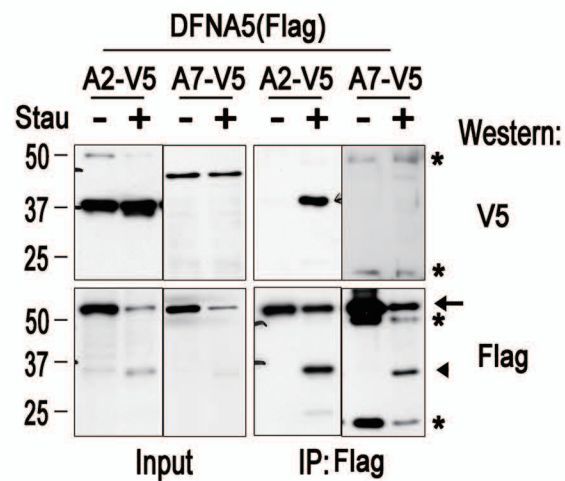



# Figure 8

made available under aCC-BY-ND 4.0 International license.

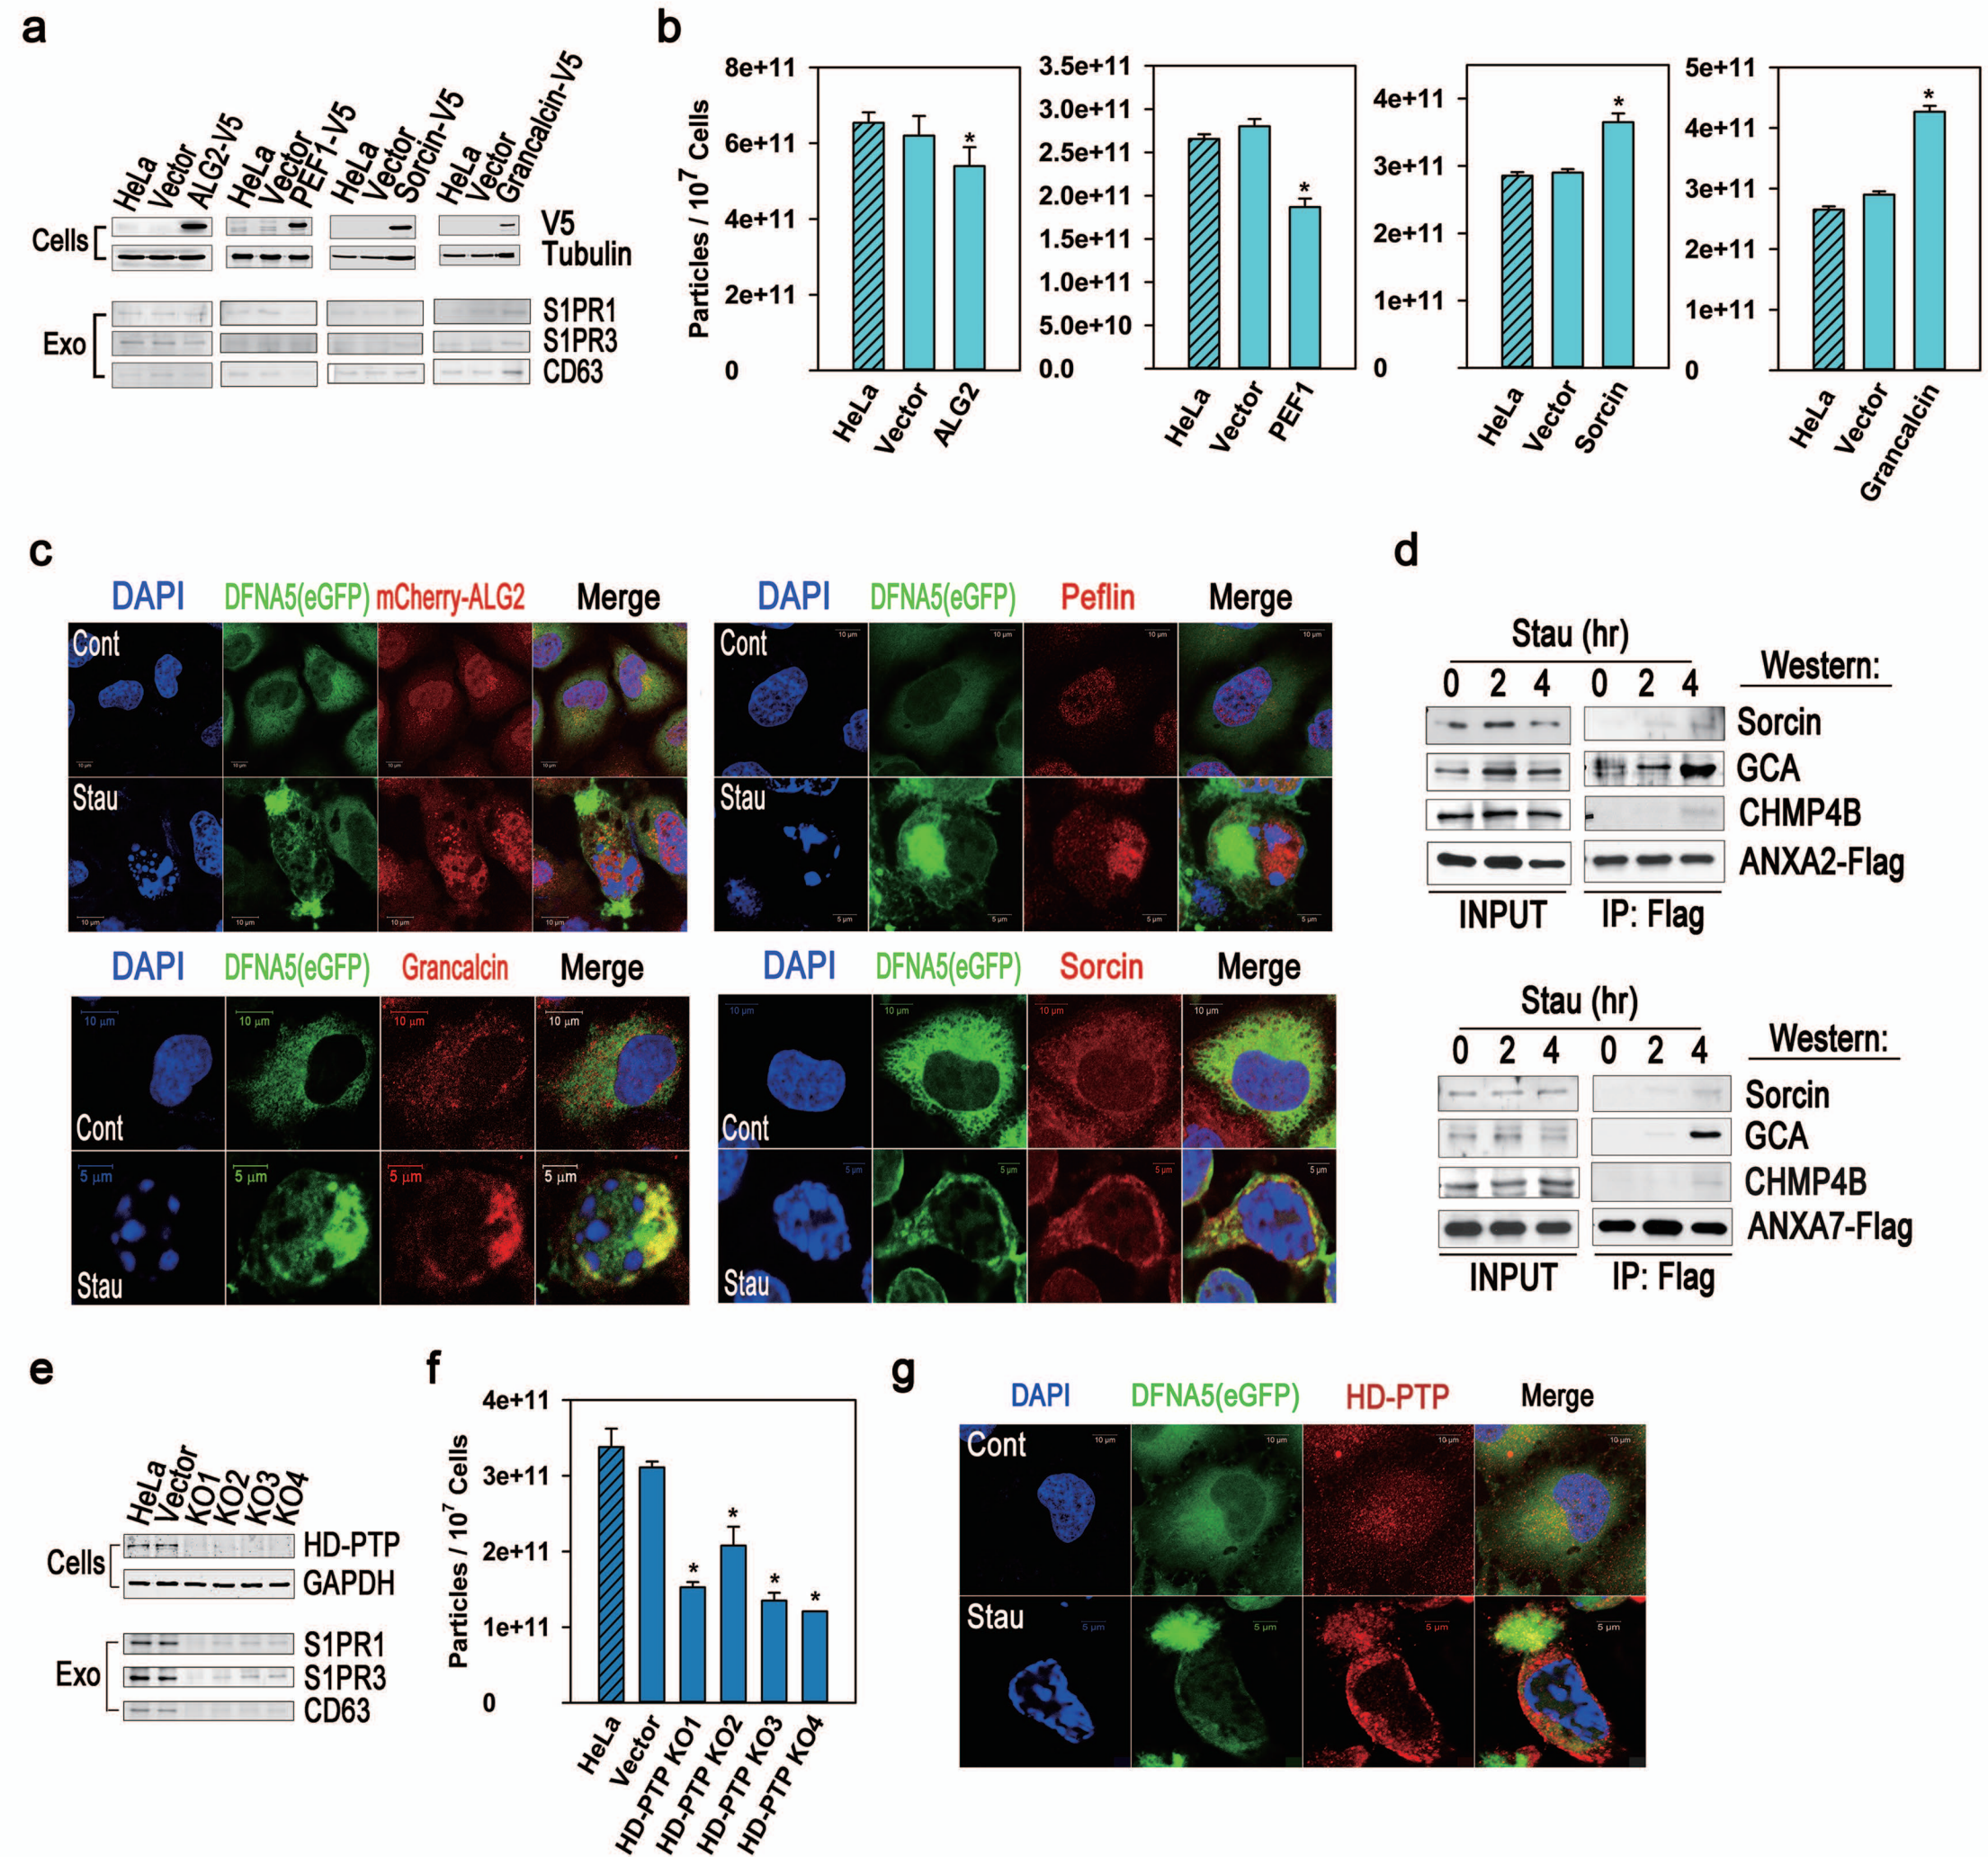

Source: https://biorxiv.org/content/10.1101/2021.04.27.441709v1.full.pdf
